# Supplementary material for: Narrow Versus Broad Phenotype Definitions Affect Genetic Analysis of Language More Than Other Broad Autism Phenotype Traits
Source: Research Square preprint supplement (doi:10.21203/rs.3.rs-5457750/v1), 2025-05-06
Supplement: Supplementary file 1 [file Linkage Analysis Supplementary Table - 11032024.xlsx]

## Sheet: TableList
Supplemental Tables
Table S1: Candidate Genes from pVAAST Analysis
Table S2: CNV Candidate Variants
Table S3: SV Candidate Variants
Table S4: Language Impairment and Reading Impairment Candidate Genes

## Sheet: TableS1a
Table S1a: Summary of Language Impairment Dominant Candidate Variants
Rank	Gene	FullName	Found in Pathway	mRNA	Chr	Score	PValue	LOD_Score	LOD_PValue	Strand	#ofVar	VarType	VarScore	VarLODScore	VarPosition	Ref	GenoType
1	POLG	Homo sapiens polymerase (DNA directed) gamma (POLG) transcript variant 1 mRNA.		NM_001126131	chr15	161.78	1e-06	0.3	0.2	-	4	SNP	22.59	0-72|0.00	89861826	T|E	N|4-6|C:T|G:E;N|7-9|C:T|G:E;N|20,27|C:T|G:E;N|45|C:T|G:E;N|46-49,52|C:T|G:E;N|59|^:^|^:^;N|76,78|C:T|G:E;N|85,87|C:T|G:E;N|94|^:^|^:^;N|105|C:C|G:G;N|102-103|C:T|G:E;N|126-127|C:T|G:E;N|140|C:T|G:E;N|145-148|C:T|G:E;N|212-213,216-217|C:T|G:E;N|214|^:^|^:^;N|219|C:T|G:E;N|224|C:T|G:E;N|233-234|C:T|G:E
												SNP	6.98	48|0.30;0-47,49-72|0.00	89864088	G|R	N|190,192|A:G|C:R
												SNP	6.81	0-72|0.00	89865073	T|Y	N|14|^:^|^:^;N|115,117,119|C:T|C:Y;N|167|^:^|^:^
												mnp	126.02	0-72|0.00	89876828	TGCTGCTGCTGC|QQQQQ	0|^:^|^:^;4-6|-:TGCTGCTGCTGC|-:QQQQQ;13|TGCTGCTGCTGC:TGCTGCTGCTGCTGC|QQQQQ:QQQQQQ;15-16,19|TGCTGCTGCTGC:TGCTGCTGCTGCTGCTGC|QQQQQ:QQQQQQ;18|^:^|^:^;20|^:^|^:^;28|TGCTGCTGCTGC:TGCTGCTGCTGCTGC|QQQQQ:QQQQQQ;31|TGCTGC:TGCTGCTGCTGC|QQQ:QQQQQ;34|TGCTGCTGCTGC:TGCTGCTGCTGCTGC|QQQQQ:QQQQQQ;36-40|TGCTGCTGCTGC:TGCTGCTGCTGCTGC|QQQQQ:QQQQQQ;51|^:^|^:^;55,58-59|TGCTGCTGCTGC:TGCTGCTGCTGCTGC|QQQQQ:QQQQQQ;64,66|TG…
2	AKAP13	Homo sapiens A kinase (PRKA) anchor protein 13 (AKAP13) transcript variant 3 mRNA.		NM_006738	chr15	111.37	1e-06	0.08	0.6	+	13	SNP	16.34	0-72|0.00	86087095	G|G	N|20|A:G|R:G;N|93,96,98|A:G|R:G;N|226-227|A:G|R:G;N|232,234|A:G|R:G
												SNP	4.61	0-72|0.00	86122299	G|E	N|59|^:^|^:^;N|213|^:^|^:^;N|264-265|A:G|K:E
												SNP	14.22	0-72|0.00	86122875	A|K	N|2|A:C|K:Q;N|6|^:^|^:^;N|48,50-53|A:C|K:Q;N|64-65|A:C|K:Q;N|74,76,78|A:C|K:Q;N|92|A:C|K:Q;N|118|^:^|^:^;N|175|^:^|^:^;N|179|A:C|K:Q;N|209,211|A:C|K:Q;N|240|A:C|K:Q
												SNP	0.95	0-72|0.00	86123770	A|Y	N|24|^:^|^:^;N|55|^:^|^:^;N|238|^:^|^:^;N|250-251|A:T|Y:F
												SNP	2.96	0-72|0.00	86123809	C|T	N|55|^:^|^:^;N|152,154|C:T|T:M
												SNP	30.58	0-72|0.00	86123851	C|S	N|8,10|C:T|S:F;N|41-42,44|C:T|S:F;N|55,58-59|C:T|S:F;N|70,72-73|C:T|S:F;N|112,114|C:T|S:F;N|151|C:T|S:F;N|186|C:T|S:F;N|198|C:T|S:F;N|207|C:T|S:F;N|230-231|C:T|S:F
												SNP	9.71	0-72|0.00	86124616	A|E	N|4-6|A:G|E:G;N|44|A:G|E:G;N|56-57,59|A:G|E:G;N|70|A:G|E:G;N|93|^:^|^:^;N|99,101|A:G|E:G;N|143|A:G|E:G;N|167|^:^|^:^;N|206|A:G|E:G;N|221-222|A:G|E:G
												SNP	21.64	0-72|0.00	86124712	A|D	N|1|A:G|D:G;N|28|A:G|D:G;N|29-30|A:G|D:G;N|33,35|A:G|D:G;N|67-68|A:G|D:G;N|84|A:G|D:G;N|181,183|A:G|D:G;N|200,202|A:G|D:G;N|212|A:G|D:G;N|244|A:G|D:G;N|254,257|A:G|D:G
												SNP	1.9	0-72|0.00	86198846	A|S	N|238|^:^|^:^;N|239|A:G|S:G
												SNP	3.79	33|0.08;0-32,34-72|0.00	86198852	C|P	N|138,140|C:T|P:S;N|238|^:^|^:^;N|250|^:^|^:^
												SNP	3.42	0-72|0.00	86236622	C|P	N|37-38|C:G|P:A
												SNP	1.64	0-72|0.00	86259072	G|A	N|46|^:^|^:^;N|57|^:^|^:^;N|106|^:^|^:^;N|185|^:^|^:^;N|192|A:G|T:A;N|243|^:^|^:^
												SNP	3.22	0-72|0.00	86286840	T|S	N|52|^:^|^:^;N|74|^:^|^:^;N|108|C:T|P:S
3	CYP1A1	Homo sapiens cytochrome P450 family 1 subfamily A polypeptide 1 (CYP1A1) mRNA.		NM_000499	chr15	108.15	1e-06	0.33	0.2	-	8	SNP	7.6	48|0.30;0-47,49-72|0.00	75012837	C|R	N|132|^:^|^:^;N|190,192|A:C|L:R
												SNP	6.37	0-72|0.00	75012940	G|R	N|26|^:^|^:^;N|164|A:G|W:R;N|228|^:^|^:^;N|238|^:^|^:^
												SNP	48.52	0-72|0.00	75012987	G|T	N|1|G:T|T:N;N|4|G:T|T:N;N|13|G:T|T:N;N|14-15,17|G:T|T:N;N|46-47,49-50,52-53|G:T|T:N;N|57-58|G:T|T:N;N|63|G:T|T:N;N|68|G:T|T:N;N|86|G:T|T:N;N|106-107,109|G:T|T:N;N|115|^:^|^:^;N|125|G:T|T:N;N|149-150|G:T|T:N;N|157|G:T|T:N;N|159|G:T|T:N;N|165,167-168|G:T|T:N;N|169,171|G:T|T:N;N|173,175|G:T|T:N;N|182|G:T|T:N;N|198-199|G:T|T:N;N|208|G:T|T:N;N|222|G:T|T:N;N|247,249|G:T|T:N;N|251-252|G:T|T:N;N|258,260|…
												SNP	13.38	0-72|0.00	75013051	C|D	N|55|^:^|^:^;N|99,101|C:T|D:N;N|186|C:T|D:N;N|200-201|C:T|D:N
												SNP	13.27	0-72|0.00	75014027	A|I	N|29,31|A:G|I:T;N|48-49,54|A:G|I:T;N|88-89,92|A:G|I:T
												SNP	0	52|0.30;0-51,53-72|0.00	75014825	C|R	N|16|^:^|^:^;N|203-205|C:T|R:Q;N|253|^:^|^:^
												SNP	6.36	20|0.03;0-19,21-72|0.00	75015045	C|A	N|3|C:G|A:P;N|23|^:^|^:^;N|85-86|C:G|A:P;N|103|^:^|^:^;N|244|^:^|^:^
												del	13.08	0-72|0.00	75015123	G|R	45|^:^|^:^;65|^:^|^:^;68|^:^|^:^;76|^:^|^:^;87|^:^|^:^;102-103|^:^|^:^;108|-:G|-:R;112-114|^:^|^:^;125|^:^|^:^;135|^:^|^:^;141|^:^|^:^;168|^:^|^:^;188|^:^|^:^;195|^:^|^:^;203-205|-:G|-:R;216|^:^|^:^;241|^:^|^:^;252|^:^|^:^;259|^:^|^:^;263|^:^|^:^
4	CSPG4	Homo sapiens chondroitin sulfate proteoglycan 4 (CSPG4) mRNA.		NM_001897	chr15	95.27	1e-06	1.47	0.03	-	11	SNP	4.19	0-72|0.00	75968547	C|G	N|18|^:^|^:^;N|151|^:^|^:^;N|155|^:^|^:^;N|161-162|C:T|G:R;N|170|^:^|^:^
												SNP	16.5	0-72|0.00	75968921	C|R	N|32,35|C:T|R:H;N|63|C:T|R:H;N|71|C:T|R:H;N|99-100|C:T|R:H;N|151|^:^|^:^;N|204|^:^|^:^;N|221-222|C:T|R:H;N|238|^:^|^:^
												SNP	2.71	17|0.46;0-16,18-72|0.00	75975211	C|G	N|0|^:^|^:^;N|75-77|C:T|G:S;N|195|^:^|^:^;N|207|^:^|^:^
												SNP	3.06	0-72|0.00	75980704	A|V	N|96|^:^|^:^;N|155,157|A:C|V:G;N|238|^:^|^:^;N|249|A:C|V:G
												SNP	6.98	19|0.21;0-18,20-72|0.00	75980780	G|R	N|82-83|A:G|C:R;N|155|^:^|^:^
												SNP	13.36	0-72|0.00	75981983	C|G	N|111-113|C:T|G:R;N|132,134-135|C:T|G:R;N|236-237|C:T|G:R
												SNP	11.48	0-72|0.00	75982186	G|P	N|0-1|A:G|L:P;N|7,9-10|A:G|L:P;N|20,23|^:^|^:^;N|46-47,51,54|A:G|L:P;N|68|A:G|L:P;N|67|^:^|^:^;N|93,98|A:G|L:P;N|133|A:G|L:P;N|150|^:^|^:^;N|156|^:^|^:^;N|183|A:G|L:P;N|196,199|A:G|L:P;N|212-214,217|A:G|L:P;N|225|A:G|L:P;N|266|^:^|^:^
												SNP	15.27	70|0.50;13|0.21;7|0.01;0-5,8-12,14-69,71-72|0.00;6|-0.02	75982312	C|R	N|4|C:T|R:Q;N|28|C:T|R:Q;N|29|C:T|R:Q;N|30|^:^|^:^;N|47,54|^:^|^:^;N|60|C:T|R:Q;N|106|^:^|^:^;N|129|^:^|^:^;N|162|^:^|^:^;N|214|^:^|^:^;N|249|C:T|R:Q;N|247|^:^|^:^;N|262|C:T|R:Q
												SNP	9.04	0-72|0.00	75982513	A|I	N|4|^:^|^:^;N|29-30|A:G|I:T;N|42|^:^|^:^;N|54|^:^|^:^;N|68|^:^|^:^;N|91|^:^|^:^;N|122|^:^|^:^;N|164|^:^|^:^;N|165,167-168|A:G|I:T;N|204|^:^|^:^;N|218|^:^|^:^;N|224|^:^|^:^;N|228|^:^|^:^;N|239|A:G|I:T;N|249|A:G|I:T;N|262|^:^|^:^;N|264|^:^|^:^
												SNP	2.5	27|0.09;0-26,28-72|0.00	75982702	C|R	N|116-119|C:T|R:Q;N|136|^:^|^:^;N|238|^:^|^:^
												SNP	7.48	0-72|0.00	75982957	C|G	N|0|^:^|^:^;N|43|^:^|^:^;N|71,73|^:^|^:^;N|123|^:^|^:^;N|149-150|C:T|G:D;N|217|^:^|^:^
5	AGBL1	Homo sapiens ATP/GTP binding protein-like 1 (AGBL1) mRNA.		NM_152336	chr15	92.64	1e-06	0.84	0.08	+	8	SNP	8.21	0-72|0.00	86697675	C|R	N|22|^:^|^:^;N|236,238|C:T|R:W;N|244|C:T|R:W
												SNP	23.59	0-72|0.00	86702241	C|R	N|44|C:T|R:C;N|72|^:^|^:^;N|93,96,98|C:T|R:C;N|130|C:T|R:C;N|172-174|C:T|R:C;N|175|T:T|C:C;N|185-187,189|C:T|R:C;N|184,188|T:T|C:C;N|212-214,217|C:T|R:C;N|222|C:T|R:C;N|229|C:T|R:C;N|247,249|C:T|R:C;N|251-252|C:T|R:C
												SNP	20.07	0-72|0.00	86790997	G|V	N|29-30|A:G|M:V;N|69|A:G|M:V;N|72|^:^|^:^;N|108|^:^|^:^;N|145,147|A:G|M:V;N|196,199|A:G|M:V;N|255-256|A:G|M:V
												SNP	10.18	68|0.42;44|0.39;0-22,24-36,38-43,45-67,69-72|0.00;23,37|-0.03	86800154	C|P	N|99-100|C:T|P:L;N|152,154|C:T|P:L;N|172,174,176|C:T|P:L;N|253-256|C:T|P:L
												SNP	2.99	0-72|0.00	86807790	C|P	N|199|^:^|^:^;N|239|C:T|P:L
												SNP	11.19	48|0.30;32|-0.00;0-31,33-47,49-72|0.00	87099508	G|G	N|57|^:^|^:^;N|137|A:G|S:G;N|164|A:G|S:G;N|190,192|A:G|S:G;N|210|^:^|^:^
												SNP	8.86	1|0.60;0,2-72|0.00	87217666	C|R	N|3,5-6|C:T|R:*;N|195|^:^|^:^;N|238|^:^|^:^
												SNP	5.66	0-72|0.00	87531283	A|N	N|4|A:G|N:S;N|7-9|A:G|N:S;N|37-40|A:G|N:S;N|36|G:G|S:S;N|195|^:^|^:^;N|210|^:^|^:^
6	MYO9A	Homo sapiens myosin IXA (MYO9A) mRNA.	Neurological system process	NM_006901	chr15	83.35	1e-06	0.1	0.4	-	10	SNP	0	27|0.09;0-26,28-72|0.00	72120240	T|I	N|116-119|C:T|V:I;N|177,180|C:T|V:I
												SNP	6	0-72|0.00	72122642	C|R	N|89,91|C:T|R:H;N|235,237|C:T|R:H;N|238|^:^|^:^
												SNP	19.18	0-72|0.00	72170400	G|S	N|11,13|A:G|L:S;N|79-80|A:G|L:S;N|146-147|A:G|L:S;N|170|A:G|L:S;N|183|A:G|L:S;N|198-199|A:G|L:S;N|241|A:G|L:S;N|251-252|A:G|L:S;N|261-262|A:G|L:S
												SNP	21.97	0-72|0.00	72172798	G|R	N|11-12|A:G|C:R;N|22|^:^|^:^;N|60-61|A:G|C:R;N|63|A:G|C:R;N|72|A:G|C:R;N|71|^:^|^:^;N|74,77|A:G|C:R;N|83|A:G|C:R;N|152|A:G|C:R;N|197-198|A:G|C:R;N|203,205-206|A:G|C:R;N|214|^:^|^:^;N|238|^:^|^:^
												SNP	14.77	0-72|0.00	72172883	G|H	N|12|C:G|Q:H;N|59|^:^|^:^;N|93,98|C:G|Q:H;N|116|C:C|Q:Q;N|117-119|C:G|Q:H;N|121|C:G|Q:H;N|177,180|C:G|Q:H;N|215,217|C:G|Q:H;N|238|^:^|^:^;N|258,260|C:G|Q:H
												SNP	6.62	0-72|0.00	72189952	T|N	N|2|A:T|I:N;N|28|A:T|I:N;N|34|A:T|I:N;N|101|A:T|I:N;N|115,118|A:T|I:N;N|195|A:T|I:N;N|200-201|A:T|I:N;N|204|^:^|^:^;N|219|A:T|I:N
												SNP	0.62	0-72|0.00	72191104	T|Q	N|132,134-135|C:T|R:Q
												SNP	5.16	0-72|0.00	72191110	T|D	N|239|C:T|G:D
												SNP	7.24	30,33|0.05;0-29,31-32,34-72|0.00	72208780	A|D	N|129-130|A:T|D:E;N|138,140|A:T|D:E
												SNP	3.29	0-72|0.00	72244199	T|M	N|16|^:^|^:^;N|23|^:^|^:^;N|41|^:^|^:^;N|48|^:^|^:^;N|132|^:^|^:^;N|137|C:T|V:M;N|238|^:^|^:^
7	ALPK3	Homo sapiens alpha-kinase 3 (ALPK3) mRNA.		NM_020778	chr15	77.15	1e-06	0.28	0.4	+	10	SNP	0.02	44|0.39;31|0.19;0-30,32-43,45-46,48-56,58-72|0.00;47|-0.23;57|-0.30	85360271	A|H	N|25|^:^|^:^;N|43|^:^|^:^;N|135-136|A:G|H:R;N|151|^:^|^:^;N|159|A:G|H:R;N|170|^:^|^:^;N|172,174-175|A:G|H:R;N|184,187-188|A:G|H:R;N|195|^:^|^:^;N|221|A:G|H:R;N|222|G:G|R:R
												SNP	0	3|0.29;0-2,4-72|0.00	85360636	G|G	N|3-6|^:^|^:^;N|11,13|A:G|S:G;N|14-16|^:^|^:^;N|20,22-23,25-27|^:^|^:^;N|32-33|^:^|^:^;N|37|^:^|^:^;N|41-43|^:^|^:^;N|46-51,53-54|^:^|^:^;N|56-58|^:^|^:^;N|67|^:^|^:^;N|71-72|^:^|^:^;N|74|^:^|^:^;N|87|^:^|^:^;N|88-89|^:^|^:^;N|93,95|^:^|^:^;N|106|^:^|^:^;N|115,117-119|^:^|^:^;N|120-124|^:^|^:^;N|125-128|^:^|^:^;N|132-133,135|^:^|^:^;N|141-142|^:^|^:^;N|145-146|^:^|^:^;N|149,151|^:^|^:^;N|173|^:^|…
												SNP	10.27	0-72|0.00	85382307	G|R	N|25|^:^|^:^;N|69|A:G|H:R;N|139|A:G|H:R;N|199|^:^|^:^;N|203,205-206|A:G|H:R
												SNP	9.27	0-72|0.00	85383709	A|Q	N|11-12|A:G|Q:R;N|46-47,49-50,52-53|A:G|Q:R;N|55|^:^|^:^;N|83|A:G|Q:R;N|108|A:G|Q:R;N|181|^:^|^:^;N|210|A:G|Q:R;N|229|A:G|Q:R;N|240|A:G|Q:R;N|247-248|A:G|Q:R
												SNP	3.69	0-72|0.00	85399869	C|R	N|132-133,136|C:T|R:C;N|204|^:^|^:^;N|236-237|C:T|R:C
												SNP	4.62	0-72|0.00	85400400	G|E	N|22|^:^|^:^;N|155,157|A:G|K:E
												SNP	1.69	45|0.09;0-44,46-72|0.00	85400499	C|P	N|88|^:^|^:^;N|177-179|C:T|P:S
												SNP	6.2	0-72|0.00	85401370	C|A	N|73|^:^|^:^;N|88,90-91|C:T|A:V;N|103-104|C:T|A:V;N|206|C:T|A:V
												SNP	20.95	0-72|0.00	85401597	C|R	N|14,18-19|C:T|R:W;N|46|^:^|^:^;N|140|^:^|^:^;N|151|^:^|^:^;N|159|C:T|R:W;N|172,174-175|C:T|R:W;N|184,187-188|C:T|R:W;N|221|C:T|R:W;N|222|T:T|W:W;N|239|C:T|R:W
												SNP	21.18	0-72|0.00	85403105	C|A	N|44|A:C|D:A;N|48|A:A|D:D;N|49-54|A:C|D:A;N|75-77|A:C|D:A;N|93,96-98|A:C|D:A;N|132|^:^|^:^;N|161,163|A:C|D:A;N|195|^:^|^:^;N|208|A:C|D:A
8	KIAA1024	Homo sapiens KIAA1024 (KIAA1024) mRNA.		NM_015206	chr15	76.26	1e-06	1.13	0.02	+	10	SNP	27.07	0-72|0.00	79749261	A|N	N|29,31|A:C|N:H;N|49|^:^|^:^;N|122-124|A:C|N:H;N|121|C:C|H:H;N|131|A:C|N:H;N|149-150|A:C|N:H;N|157|A:C|N:H;N|195|A:C|N:H;N|196-197|A:C|N:H;N|206|A:C|N:H;N|208|C:C|H:H;N|223-225|A:C|N:H;N|229-231|A:C|N:H;N|240|A:C|N:H
												SNP	1.56	0-72|0.00	79749700	A|N	N|46-47,51,54|A:G|N:S;N|73|^:^|^:^
												SNP	4.76	0-72|0.00	79749702	T|F	N|28|C:T|L:F;N|91|^:^|^:^;N|244|C:T|L:F
												SNP	12.64	52|0.30;0-51,53-72|0.00	79750056	C|R	N|95|^:^|^:^;N|203,205-206|C:T|R:*
												SNP	0	13|0.24;0-12,14-72|0.00	79750188	A|I	N|46|^:^|^:^;N|60-61|A:G|I:V
												SNP	2.43	0-72|0.00	79750419	A|I	N|37|^:^|^:^;N|55-56|A:T|I:L;N|132|^:^|^:^;N|152|A:T|I:L
												SNP	5.78	62|0.58;0-61,63-72|0.00	79750609	C|P	N|47,51|^:^|^:^;N|198|^:^|^:^;N|236-237|A:C|Q:P
												SNP	8.21	0-72|0.00	79755583	C|R	N|62|C:T|R:W;N|99-100|C:T|R:W;N|156|^:^|^:^;N|204,206|^:^|^:^
												SNP	5.66	0-72|0.00	79760530	C|T	N|79,81|C:T|T:M;N|150|C:T|T:M;N|170|^:^|^:^;N|214|^:^|^:^;N|238|^:^|^:^
												del	4.96	0-72|0.00	79755607	GAG|E	14|^:^|^:^;146|^:^|^:^;164|-:GAG|-:E
9	ACAN	Homo sapiens aggrecan (ACAN) transcript variant 2 mRNA.	Nervous System Development	NM_013227	chr15	74.02	1e-06	1.04	0.07	+	15	SNP	3.29	0-72|0.00	89382008	C|T	N|48,53|^:^|^:^;N|94|A:C|N:T
												SNP	3.14	0-72|0.00	89382022	G|A	N|4|^:^|^:^;N|14|^:^|^:^;N|48|^:^|^:^;N|76,78|A:G|T:A;N|107|^:^|^:^;N|203|^:^|^:^
												SNP	2.98	0-72|0.00	89382129	C|D	N|23|^:^|^:^;N|126|^:^|^:^;N|239|A:C|E:D
												SNP	5.32	0-72|0.00	89383306	G|R	N|192|A:G|Q:R
												SNP	4.95	31|0.19;0-30,32-72|0.00	89389050	T|F	N|43|^:^|^:^;N|134-135|C:T|L:F;N|151|^:^|^:^
												SNP	25.76	0-72|0.00	89390513	C|S	N|42|^:^|^:^;N|49-50,53-54|C:T|S:L;N|88-90,92|C:T|S:L;N|129-130|C:T|S:L;N|140|C:T|S:L;N|145,147|C:T|S:L;N|151|^:^|^:^;N|152,154|C:T|S:L;N|195|^:^|^:^;N|228|C:T|S:L;N|250-251|C:T|S:L
												SNP	0	52|0.30;0-51,53-72|0.00	89392786	G|R	N|67|^:^|^:^;N|195|^:^|^:^;N|203-205|A:G|H:R;N|214|^:^|^:^
												SNP	1.96	34|0.38;0-33,35-72|0.00	89400204	C|A	N|75|^:^|^:^;N|141-143|C:T|A:V
												SNP	1.12	33|0.08;0-32,34-72|0.00	89400341	C|L	N|91|^:^|^:^;N|104|^:^|^:^;N|138,140|C:T|L:F
												SNP	6.65	14|0.21;0-13,15-17,19-72|0.00;18|-0.12	89401134	T|L	N|63|C:T|P:L;N|79,81|C:T|P:L;N|167|^:^|^:^
												SNP	7.68	52|0.30;0-51,53-72|0.00	89401362	G|G	N|4|^:^|^:^;N|27|^:^|^:^;N|203-205|G:T|G:V;N|238|^:^|^:^
												SNP	0	52|0.30;0-51,53-72|0.00	89401814	G|G	N|203-205|A:G|S:G
												SNP	0	52|0.30;0-51,53-72|0.00	89401989	C|P	N|4|^:^|^:^;N|203-205|C:T|P:L
												SNP	2.47	0-72|0.00	89402176	C|S	N|137|C:G|S:R
												SNP	7.88	0-72|0.00	89417117	G|G	N|50|^:^|^:^;N|109|^:^|^:^;N|122|^:^|^:^;N|151|^:^|^:^;N|169,171|A:G|R:G
10	ADAMTSL3	Homo sapiens ADAMTS-like 3 (ADAMTSL3) mRNA.	Nervous System Development	NM_207517	chr15	66.17	1e-06	0.28	0.3	+	9	SNP	8.37	21|0.40;0-20,22-62,64-72|0.00;63|-0.19	84506964	A|K	N|88,90-91|A:G|K:E;N|122|^:^|^:^;N|239|A:G|K:E
												SNP	2.5	0-72|0.00	84561468	T|V	N|169,171|C:T|A:V;N|238|^:^|^:^
												SNP	3.77	0-72|0.00	84568467	G|A	N|129,131|G:T|A:S
												SNP	8.12	0-72|0.00	84611703	C|R	N|8|^:^|^:^;N|36,38,40|C:T|R:W
												SNP	4.3	0-72|0.00	84611805	C|P	N|55,58-59|C:T|P:S;N|157|C:T|P:S;N|171|C:T|P:S
												SNP	8.85	0-72|0.00	84651057	G|E	N|46-47,49-50,52-53|A:G|K:E;N|55|^:^|^:^;N|103|^:^|^:^;N|108|A:G|K:E;N|210|A:G|K:E;N|228|A:G|K:E;N|229|A:G|K:E;N|240|A:G|K:E
												SNP	8.19	35|0.06;0-34,36-72|0.00	84651321	C|R	N|145,148|C:T|R:W;N|204|^:^|^:^
												SNP	6.48	0-72|0.00	84683428	A|T	N|71|^:^|^:^;N|137|A:G|T:A;N|264-265|A:G|T:A
												SNP	16.33	0-72|0.00	84700108	C|R	N|181-182|C:T|R:C;N|184-185,188-189|C:T|R:C;N|193-194|C:T|R:C;N|233-234|C:T|R:C
11	KIAA1199	Homo sapiens KIAA1199 (KIAA1199) mRNA.		NM_018689	chr15	62.71	1e-06	0.38	0.2	+	8	SNP	8.17	46|0.04;0-45,47-72|0.00	81187427	C|R	N|103|^:^|^:^;N|181,183|C:T|R:W
												SNP	5.86	49|0.28;0-48,50-72|0.00	81212511	T|F	N|50|^:^|^:^;N|193,195|C:T|S:F;N|266|^:^|^:^
												SNP	7.46	0-72|0.00	81221512	G|G	N|4|A:G|D:G;N|34|A:G|D:G;N|71,73|A:G|D:G
												SNP	1.64	0-72|0.00	81229192	G|A	N|55|^:^|^:^;N|111|^:^|^:^;N|244|^:^|^:^;N|264-265|A:G|T:A
												SNP	11.46	0-72|0.00	81230310	G|E	N|107-108,110|A:G|K:E;N|153-154|A:G|K:E
												SNP	5.32	0-72|0.00	81234604	C|H	N|37|^:^|^:^;N|118|^:^|^:^;N|258,260|C:T|H:Y
												SNP	5.32	35|0.06;0-34,36-72|0.00	81241174	G|R	N|73|^:^|^:^;N|106|^:^|^:^;N|145,147|A:G|Q:R
												del	17.69	0-72|0.00	81241247	GAA|VK	46-47,49-50,52-53|-:GAA|-:VK;93,96,98|-:GAA|-:VK;112,114|-:GAA|-:VK;151|^:^|^:^;162|-:GAA|-:VK;210|-:GAA|-:VK;223,225|-:GAA|-:VK;253|^:^|^:^
12	TMED3	Homo sapiens transmembrane emp24 protein transport domain containing 3 (TMED3) mRNA.		NM_007364	chr15	48.65	1e-06	0.3	0.1	+	5	SNP	4.47	0-72|0.00	79603653	C|A	N|14|^:^|^:^;N|30|^:^|^:^;N|62|^:^|^:^;N|73|^:^|^:^;N|236,238|C:T|A:V;N|252|^:^|^:^;N|259-260|^:^|^:^
												SNP	14.36	0-72|0.00	79603760	G	N|9|A:G;N|20|A:G;N|70|A:G;N|73|^:^;N|92|^:^;N|161,163|A:G;N|170|^:^;N|199|^:^;N|232,234|A:G
												SNP	8.14	15|0.30;0-14,16-72|0.00	79606098	G	N|67,69|A:G
												SNP	20.87	0-72|0.00	79606186	G|D	N|21|A:A|N:N;N|22-27|A:G|N:D;N|107-108,110|A:G|N:D;N|111|^:^|^:^;N|177-179|A:G|N:D;N|235,238|A:G|N:D;N|241-242|A:G|N:D;N|265-266|A:G|N:D
												SNP	3.42	0-72|0.00	79606202	G|R	N|71|A:G|Q:R;N|119|^:^|^:^;N|152|A:G|Q:R;N|243|^:^|^:^;N|255-256|A:G|Q:R
13	DNAJA4	Homo sapiens DnaJ (Hsp40) homolog subfamily A member 4 (DNAJA4) transcript variant 3 mRNA.	Stress Response	NM_001130183	chr15	45.73	1e-06	0.3	0.1	+	4	SNP	2.5	0-72|0.00	78562867	T|V	N|27|^:^|^:^;N|57|^:^|^:^;N|89|^:^|^:^;N|93,96-97|C:T|A:V;N|212-214,217|C:T|A:V
												SNP	3.74	48|0.30;0-47,49-72|0.00	78566626	G|G	N|78|^:^|^:^;N|91|^:^|^:^;N|190,192|C:G|A:G;N|235|^:^|^:^
												SNP	5.67	0-72|0.00	78567943	T|S	N|79,81|A:T|R:S
												del	34.43	0-72|0.00	78558585	AT|M	56-57,59|-:AT|-:M;101|-:AT|-:M;120,123|-:AT|-:M;141-143|-:AT|-:M;163|-:AT|-:M;165-166|-:AT|-:M;169-170|-:AT|-:M;198-199|-:AT|-:M;221-222|-:AT|-:M;231|-:AT|-:M
14	GOLGA6A	Homo sapiens golgin A6 family member A (GOLGA6A) mRNA.		NM_001038640	chr15	39.49	1e-06	0.01	0.4	-	6	SNP	1.95	0-72|0.00	74363994	T|S	N|43|^:^|^:^;N|76|^:^|^:^;N|79|^:^|^:^;N|82|^:^|^:^;N|96|^:^|^:^;N|99|^:^|^:^;N|112|^:^|^:^;N|136|^:^|^:^;N|155|^:^|^:^;N|161|^:^|^:^;N|165,167|^:^|^:^;N|169|^:^|^:^;N|186|^:^|^:^;N|207|^:^|^:^;N|208|^:^|^:^;N|223|^:^|^:^;N|250-251|C:T|G:S
												SNP	2.96	0-72|0.00	74364599	G|T	N|8|^:^|^:^;N|21|A:G|M:T;N|28|^:^|^:^;N|60|^:^|^:^;N|63|^:^|^:^;N|85|^:^|^:^;N|110|^:^|^:^;N|129|^:^|^:^;N|137|^:^|^:^;N|153|A:G|M:T;N|160|A:G|M:T;N|158|^:^|^:^;N|164|^:^|^:^;N|181|^:^|^:^;N|200|^:^|^:^;N|222|^:^|^:^;N|226-227|^:^|^:^;N|236,238|^:^|^:^;N|239|^:^|^:^;N|241|A:G|M:T;N|242|^:^|^:^;N|244|A:G|M:T;N|265|A:G|M:T
												SNP	9.52	0-72|0.00	74364639	G|Q	N|14,18-19|C:G|E:Q;N|30|C:G|E:Q;N|145,148|C:G|E:Q;N|162-163|C:G|E:Q;N|190,192|C:G|E:Q
												SNP	2.81	2|0.01;0-1,3-72|0.00	74368076	A|I	N|3-4,6|^:^|^:^;N|8,10|A:G|I:T;N|9|^:^|^:^;N|15|^:^|^:^;N|20-27|^:^|^:^;N|37|^:^|^:^;N|42-43|^:^|^:^;N|48-50,52-53|^:^|^:^;N|55,57-59|^:^|^:^;N|71-73|^:^|^:^;N|79-81|^:^|^:^;N|87|^:^|^:^;N|89|^:^|^:^;N|93-94|^:^|^:^;N|102-103|^:^|^:^;N|112-114|^:^|^:^;N|123|^:^|^:^;N|125|^:^|^:^;N|135-136|^:^|^:^;N|155|^:^|^:^;N|165,167-168|^:^|^:^;N|172|^:^|^:^;N|178|^:^|^:^;N|182|^:^|^:^;N|184-185|^:^|^:^;N|193…
												SNP	2.23	0-72|0.00	74373040	G|P	N|0|^:^|^:^;N|8|^:^|^:^;N|37-39|G:T|P:T;N|40|^:^|^:^;N|76|^:^|^:^;N|79|^:^|^:^;N|82|^:^|^:^;N|90|^:^|^:^;N|96|^:^|^:^;N|112|^:^|^:^;N|136|^:^|^:^;N|144|G:T|P:T;N|142|^:^|^:^;N|155|^:^|^:^;N|165,167|^:^|^:^;N|169|^:^|^:^;N|174|^:^|^:^;N|186|^:^|^:^;N|207|^:^|^:^;N|208|^:^|^:^;N|223|^:^|^:^;N|239|G:T|P:T
												mnp	21.96	0-72|0.00	74364611	GCCT|EA	8|^:^|^:^;36-37,39|G:GCCT|A:EA;41-42,44|G:GCCT|A:EA;58|G:GCCT|A:EA;59|^:^|^:^;60|^:^|^:^;74,78|G:GCCT|A:EA;84|G:GCCT|A:EA;120,122,124|G:GCCT|A:EA;164|^:^|^:^;181|^:^|^:^;198-199|G:GCCT|A:EA;210-211|G:GCCT|A:EA;218|G:GCCT|A:EA;239|^:^|^:^;252|G:GCCT|A:EA;258|^:^|^:^
15	UACA	Homo sapiens uveal autoantigen with coiled-coil domains and ankyrin repeats (UACA) transcript variant 2 mRNA.		NM_001008224	chr15	34.74	2e-06	0.38	0.1	-	5	SNP	5.58	42|0.30;0-41,43-72|0.00	70959422	C|V	N|165,167-168|A:C|F:V
												SNP	1.46	0-72|0.00	70960395	T|L	N|27|^:^|^:^;N|52|^:^|^:^;N|73|^:^|^:^;N|240,242|A:T|F:L
												SNP	7.73	0-72|0.00	70960730	T|N	N|164|G:T|H:N;N|264-265|G:T|H:N
												SNP	11.36	0-72|0.00	70961649	T|Q	N|79,81|G:T|H:Q;N|178,180|G:T|H:Q;N|255|G:T|H:Q
												SNP	8.86	67|0.08;0-66,68-72|0.00	70976603	C	N|251-252|A:C
16	C15orf42	Homo sapiens chromosome 15 open reading frame 42 (C15orf42) mRNA.		NM_152259	chr15	41.89	3e-06	0.47	0.2	+	10	SNP	3.83	0-72|0.00	90119420	G|M	N|4,6|^:^|^:^;N|27|^:^|^:^;N|222|^:^|^:^;N|264-265|C:G|I:M;N|266|^:^|^:^
												SNP	5.18	0-72|0.00	90119448	G|V	N|19|^:^|^:^;N|103|^:^|^:^;N|112,114|A:G|M:V;N|156|^:^|^:^;N|250|A:G|M:V
												SNP	2.3	0-72|0.00	90135278	C|A	N|14,18-19|C:T|A:V;N|22|^:^|^:^
												SNP	0	71|0.30;0-70,72|0.00	90142665	G|V	N|264,266-267|A:G|I:V
												SNP	10.75	0-72|0.00	90144615	T|V	N|103|^:^|^:^;N|120,122,124|C:T|A:V;N|214|^:^|^:^;N|218,220|C:T|A:V;N|262-263|C:T|A:V;N|271|C:T|A:V
												SNP	4.42	0-72|0.00	90152079	C|S	N|124|^:^|^:^;N|164|C:G|S:C
												SNP	11.18	0-72|0.00	90167139	G|G	N|70|^:^|^:^;N|89|^:^|^:^;N|107,109|A:G|S:G;N|137|A:G|S:G;N|241-242|A:G|S:G;N|267|^:^|^:^
												SNP	1.74	0-72|0.00	90167382	G|A	N|21,23|C:G|P:A;N|20|^:^|^:^;N|72|^:^|^:^;N|195|^:^|^:^
												SNP	1.05	0-72|0.00	90167736	C|Q	N|48,50-53|C:G|Q:E
												SNP	1.24	21|0.46;0-20,22-72|0.00	90169187	T|C	N|27|^:^|^:^;N|88,90-91|C:T|R:C;N|136|^:^|^:^
17	IL16	Homo sapiens interleukin 16 (IL16) transcript variant 1 mRNA.	Nervous System Development;Neurological system process	NM_001172128	chr15	44.89	4e-06	0.3	0.2	+	5	SNP	8.15	0-72|0.00	81561897	C|R	N|4|^:^|^:^;N|137|C:T|R:W;N|238|^:^|^:^
												SNP	7.23	48|0.30;0-47,49-72|0.00	81582836	G|E	N|67|^:^|^:^;N|125|^:^|^:^;N|190,192|A:G|K:E
												SNP	5.39	0-72|0.00	81591816	A|I	N|0,2|A:G|I:V;N|61|^:^|^:^;N|152,154|A:G|I:V;N|156|A:G|I:V;N|168|A:G|I:V
												SNP	8.54	0-72|0.00	81592311	C|R	N|33,35|C:T|R:W;N|67-68|C:T|R:W;N|81|C:T|R:W;N|106|^:^|^:^
												SNP	16.18	0-72|0.00	81592384	C|S	N|36-37,39|C:T|S:L;N|48-49,54|C:T|S:L;N|64-65|C:T|S:L;N|135|^:^|^:^;N|164|C:T|S:L;N|182|C:T|S:L
18	WHAMM	Homo sapiens WAS protein homolog associated with actin golgi membranes and microtubules (WHAMM) mRNA.		NM_001080435	chr15	39.33	6e-06	1.07	0.008	+	6	SNP	5.62	0-72|0.00	83478929	C|R	N|7|^:^|^:^;N|19|^:^|^:^;N|22-23,25-26|^:^|^:^;N|36,40|^:^|^:^;N|46|^:^|^:^;N|56|^:^|^:^;N|74|^:^|^:^;N|80|^:^|^:^;N|89,91|^:^|^:^;N|103|^:^|^:^;N|121|^:^|^:^;N|125|^:^|^:^;N|150-151|^:^|^:^;N|156|^:^|^:^;N|170|^:^|^:^;N|195|^:^|^:^;N|236,238|A:C|S:R;N|244|^:^|^:^;N|257|^:^|^:^;N|265|^:^|^:^
												SNP	4.22	0-72|0.00	83478989	C|P	N|7|^:^|^:^;N|23,26|^:^|^:^;N|40|^:^|^:^;N|50|^:^|^:^;N|55|^:^|^:^;N|93|^:^|^:^;N|121|^:^|^:^;N|151|^:^|^:^;N|195|^:^|^:^;N|213-216|C:T|P:S;N|265|^:^|^:^
												SNP	5.73	50|0.60;0-49,51-72|0.00	83478990	C|P	N|7|^:^|^:^;N|16|^:^|^:^;N|23,26|^:^|^:^;N|40|^:^|^:^;N|50|^:^|^:^;N|55|^:^|^:^;N|93|^:^|^:^;N|104|^:^|^:^;N|113|^:^|^:^;N|116|^:^|^:^;N|121|^:^|^:^;N|140|^:^|^:^;N|151|^:^|^:^;N|170|^:^|^:^;N|186|^:^|^:^;N|195|^:^|^:^;N|196,199|C:T|P:L;N|265|^:^|^:^
												SNP	10.54	0-72|0.00	83495214	T|I	N|29,31|A:T|K:I;N|140|A:T|K:I;N|166-167|A:T|K:I;N|177,180|A:T|K:I;N|266|^:^|^:^
												SNP	2.99	44|0.46;0-43,45-72|0.00	83499472	C|P	N|37|^:^|^:^;N|75|^:^|^:^;N|102|^:^|^:^;N|172,174,176|C:T|P:L
												SNP	7.29	0-72|0.00	83502242	C|S	N|43|^:^|^:^;N|73|^:^|^:^;N|167|^:^|^:^;N|239|C:T|S:F
19	FANCI	Homo sapiens Fanconi anemia complementation group I (FANCI) transcript variant 2 mRNA.		NM_018193	chr15	38.86	7e-06	0.15	0.2	+	7	SNP	7.19	0-72|0.00	89805073	G|C	N|41-42,44|A:G|Y:C
												SNP	4.81	0-72|0.00	89811698	T|I	N|16-18|C:T|T:I;N|59|^:^|^:^;N|71|^:^|^:^
												SNP	6.65	0-72|0.00	89816663	T|L	N|36-37,39|C:T|P:L;N|55,59|^:^|^:^
												SNP	4.03	0-72|0.00	89828441	C|L	N|55|^:^|^:^;N|115,117,119|C:T|L:F
												SNP	12.12	21|0.09;30|0.05;0-20,22-29,31-72|0.00	89834916	G|G	N|70|^:^|^:^;N|88-90,92|A:G|R:G;N|129-130|A:G|R:G
												SNP	1.13	18|0.01;0-17,19-72|0.00	89835937	A|I	N|53|^:^|^:^;N|79-80|A:G|I:V
												SNP	4.21	0-72|0.00	89857843	G|A	N|27|^:^|^:^;N|32-34|A:G|T:A
20	STRA6	Homo sapiens stimulated by retinoic acid gene 6 homolog (mouse) (STRA6) transcript variant 5 mRNA.		NM_001142617	chr15	23.02	1e-05	0.01	0.2	-	4	SNP	15.42	0-72|0.00	74472522	C|G	N|15-16,19|C:T|G:S;N|96,98|C:T|G:S;N|118|^:^|^:^;N|170|^:^|^:^;N|195|^:^|^:^;N|204|^:^|^:^;N|215,217|C:T|G:S;N|226-227|C:T|G:S
												SNP	2.51	60|0.01;0-59,61-72|0.00	74476274	C|R	N|71|^:^|^:^;N|230-231|C:T|R:Q;N|264|^:^|^:^
												SNP	4.32	0-72|0.00	74490100	G|S	N|32-34|A:G|L:S;N|37|^:^|^:^;N|135|^:^|^:^
												SNP	2.73	0-72|0.00	74494518	C|G	N|106|^:^|^:^;N|164|C:T|G:S
21	TMEM202	Homo sapiens transmembrane protein 202 (TMEM202) mRNA.		NM_001080462	chr15	15.95	3e-05	0.3	0.05	+	2	SNP	4.29	71|0.30;0-70,72|0.00	72690734	C|R	N|91|^:^|^:^;N|213-214|^:^|^:^;N|264,266-267|C:T|R:W
												SNP	12.25	0-72|0.00	72699549	A|M	N|39-40|A:T|M:L;N|137|A:T|M:L;N|177-179|A:T|M:L;N|239|A:T|M:L
22	GOLGA6C	Homo sapiens golgin A6 family member C (GOLGA6C) mRNA.		NM_001164404	chr15	38.93	4e-05	0.31	0.2	+	7	SNP	2.93	0-72|0.00	75557692	G|R	N|0|^:^|^:^;N|8-9|^:^|^:^;N|14-15|^:^|^:^;N|36-37|^:^|^:^;N|41|^:^|^:^;N|46|^:^|^:^;N|56|^:^|^:^;N|68|^:^|^:^;N|77|A:G|Q:R;N|74|^:^|^:^;N|79-80|^:^|^:^;N|82|^:^|^:^;N|90|^:^|^:^;N|94|A:G|Q:R;N|93,96,98|^:^|^:^;N|99|^:^|^:^;N|102|^:^|^:^;N|112|^:^|^:^;N|123-124|^:^|^:^;N|128|^:^|^:^;N|136|^:^|^:^;N|145|^:^|^:^;N|149,151|^:^|^:^;N|152|^:^|^:^;N|155-156|^:^|^:^;N|161|^:^|^:^;N|165,167|^:^|^:^;N|169|…
												SNP	1.98	0-72|0.00	75558650	C|A	N|0-2|^:^|^:^;N|3-4,6|^:^|^:^;N|7-10|^:^|^:^;N|11|^:^|^:^;N|14-19|^:^|^:^;N|20-27|^:^|^:^;N|28|^:^|^:^;N|29-30|^:^|^:^;N|32-35|^:^|^:^;N|36-40|^:^|^:^;N|41-45|^:^|^:^;N|46-54|^:^|^:^;N|55-59|^:^|^:^;N|60|^:^|^:^;N|66|C:T|A:V;N|63|^:^|^:^;N|67-68|^:^|^:^;N|70-73|^:^|^:^;N|74-77|^:^|^:^;N|79-81|^:^|^:^;N|82-83|^:^|^:^;N|85-86|^:^|^:^;N|88-92|^:^|^:^;N|93-96,98|^:^|^:^;N|99-100|^:^|^:^;N|102-103,105…
												SNP	8.81	0-72|0.00	75561189	C|T	N|0|^:^|^:^;N|3-6|^:^|^:^;N|7-9|^:^|^:^;N|11,13|^:^|^:^;N|16-18|^:^|^:^;N|21,25-27|^:^|^:^;N|28|^:^|^:^;N|29-30|^:^|^:^;N|32-35|^:^|^:^;N|41-42,44|^:^|^:^;N|48,51,54|^:^|^:^;N|55-56,58-59|^:^|^:^;N|60,62|^:^|^:^;N|63-64,66|^:^|^:^;N|67,69|^:^|^:^;N|70-73|^:^|^:^;N|75-76,78|^:^|^:^;N|79-81|^:^|^:^;N|82-84|^:^|^:^;N|85-87|^:^|^:^;N|88-91|^:^|^:^;N|93,95-96,98|^:^|^:^;N|99-101|^:^|^:^;N|103|^:^|^:^;…
												SNP	7.89	38|0.30;0-37,39-72|0.00	75561830	G|G	N|0|^:^|^:^;N|8|^:^|^:^;N|18|^:^|^:^;N|21|^:^|^:^;N|28|^:^|^:^;N|42-43|^:^|^:^;N|58|^:^|^:^;N|60|^:^|^:^;N|63,66|^:^|^:^;N|76|^:^|^:^;N|79-80|^:^|^:^;N|82|^:^|^:^;N|90|^:^|^:^;N|95-96|^:^|^:^;N|99|^:^|^:^;N|108|^:^|^:^;N|112|^:^|^:^;N|119|^:^|^:^;N|129-130|^:^|^:^;N|136|^:^|^:^;N|137|^:^|^:^;N|147|^:^|^:^;N|149,151|^:^|^:^;N|155-156|A:G|R:G;N|161|^:^|^:^;N|164|^:^|^:^;N|165,167|^:^|^:^;N|169|^:^|…
												SNP	0.85	0-72|0.00	75561866	G|V	N|0|^:^|^:^;N|7-8|^:^|^:^;N|21|^:^|^:^;N|28|^:^|^:^;N|43|^:^|^:^;N|57-58|^:^|^:^;N|60|^:^|^:^;N|63,66|^:^|^:^;N|76|^:^|^:^;N|79-80|^:^|^:^;N|82|^:^|^:^;N|86|^:^|^:^;N|90,92|A:G|I:V;N|94-96|^:^|^:^;N|99|^:^|^:^;N|106-108|^:^|^:^;N|112|^:^|^:^;N|116,118-119|^:^|^:^;N|126|^:^|^:^;N|129-130|^:^|^:^;N|136|^:^|^:^;N|137|^:^|^:^;N|140|^:^|^:^;N|146-147|^:^|^:^;N|149|^:^|^:^;N|155|^:^|^:^;N|161-162|^:^|^…
												SNP	4.49	0-72|0.00	75562461	C|A	N|108|^:^|^:^;N|160|^:^|^:^;N|221|C:T|A:V;N|254|^:^|^:^;N|265-266|^:^|^:^
												SNP	12.56	2|0.01;0-1,3-72|0.00	75562499	C|Q	N|8,10|C:T|Q:*;N|108|^:^|^:^;N|264-265|^:^|^:^
23	FURIN	Homo sapiens furin (paired basic amino acid cleaving enzyme) (FURIN) mRNA.	Alzheimer Disease Amyloid Secretase Pathway;Alzheimer Disease Presenilin Pathway	NM_002569	chr15	33.41	4e-05	0.09	0.2	+	6	SNP	1.96	0-72|0.00	91419098	C|A	N|136|^:^|^:^;N|137|C:T|A:V;N|151|^:^|^:^;N|254,257|C:T|A:V;N|260|^:^|^:^
												SNP	15.33	0-72|0.00	91419548	C|R	N|6|^:^|^:^;N|22|^:^|^:^;N|33|^:^|^:^;N|67|^:^|^:^;N|107,109|C:T|R:C;N|117|^:^|^:^;N|173|^:^|^:^;N|195|^:^|^:^;N|196|^:^|^:^;N|207|C:T|R:C;N|241-242|C:T|R:C;N|266|^:^|^:^
												SNP	2.55	0-72|0.00	91419740	G|V	N|73|^:^|^:^;N|264-265|A:G|M:V
												SNP	4.75	0-72|0.00	91420368	C|P	N|22|^:^|^:^;N|223,225|A:C|T:P
												SNP	4.51	0-72|0.00	91422984	C|T	N|16-18|C:T|T:I;N|73|^:^|^:^
												SNP	5.87	27|0.09;0-26,28-72|0.00	91423126	G|D	N|99|^:^|^:^;N|116-119|A:G|N:D
24	ANPEP	Homo sapiens alanyl (membrane) aminopeptidase (ANPEP) mRNA.		NM_001150	chr15	41.05	5e-05	0.08	0.3	-	7	SNP	8.18	0-72|0.00	90328681	G|R	N|11-12|A:G|W:R;N|96|^:^|^:^
												SNP	2.7	0-72|0.00	90335464	C|A	N|50|^:^|^:^;N|79,81|C:T|A:T;N|89|^:^|^:^
												SNP	7.8	0-72|0.00	90344348	C|V	N|14,18-19|C:T|V:I;N|161-162|C:T|V:I;N|214|^:^|^:^;N|261-262|C:T|V:I
												SNP	14.78	0-72|0.00	90344353	A|I	N|56-57,59|A:T|I:K;N|70|A:T|I:K;N|85,87|A:T|I:K;N|173,176|A:T|I:K;N|181,183|A:T|I:K
												SNP	0.23	0-72|0.00	90346524	G|H	N|3|^:^|^:^;N|72|^:^|^:^;N|127-128|G:T|H:Q
												SNP	0.12	0-72|0.00	90349220	T|M	N|26|^:^|^:^;N|125|^:^|^:^;N|204|^:^|^:^;N|245-246|G:T|L:M
												del	8.86	67|0.08;0-66,68-72|0.00	90349543	G|P	25|^:^|^:^;60|^:^|^:^;103|^:^|^:^;122|^:^|^:^;217|^:^|^:^;235|^:^|^:^;251-252|-:G|-:P;266|^:^|^:^
25	ACSBG1	Homo sapiens acyl-CoA synthetase bubblegum family member 1 (ACSBG1) transcript variant 1 mRNA.		NM_015162	chr15	25.13	6e-05	0.37	0.09	-	4	SNP	10.98	0-72|0.00	78466006	G|A	N|22|^:^|^:^;N|100|A:G|V:A;N|115|^:^|^:^;N|164|A:G|V:A;N|168|A:G|V:A;N|202|A:G|V:A;N|203,205-206|A:G|V:A;N|247,249|A:G|V:A
												SNP	6.05	65|0.37;0-64,66-72|0.00	78466028	G|R	N|118|^:^|^:^;N|243-245|A:G|W:R
												SNP	3.86	0-72|0.00	78466037	C|E	N|69|C:G|E:Q;N|213|^:^|^:^;N|256|^:^|^:^
												SNP	4.52	0-72|0.00	78485930	T|E	N|16|^:^|^:^;N|43|^:^|^:^;N|53|^:^|^:^;N|73|^:^|^:^;N|82,84|G:T|A:E;N|93|^:^|^:^;N|118|^:^|^:^;N|142|^:^|^:^;N|185|^:^|^:^;N|213|^:^|^:^;N|268|^:^|^:^
26	SEMA4B	Homo sapiens sema domain immunoglobulin domain (Ig) transmembrane domain (TM) and short cytoplasmic domain (semaphorin) 4B (SEMA4B) transcript variant 2 mRNA.	Nervous System Development	NM_020210	chr15	32.88	8e-05	0.5	0.09	+	5	SNP	3	29|0.50;0-28,30-72|0.00	90744881	C|P	N|19|^:^|^:^;N|24,26|^:^|^:^;N|58|^:^|^:^;N|125-126,128|C:T|P:L;N|132|^:^|^:^;N|151|^:^|^:^;N|195|^:^|^:^;N|212|^:^|^:^;N|265|^:^|^:^
												SNP	6.09	0-72|0.00	90767162	G|R	N|141|^:^|^:^;N|209,211|A:G|H:R;N|238|^:^|^:^;N|241|^:^|^:^
												SNP	10.1	0-72|0.00	90768389	G|D	N|80|A:G|N:D;N|113|A:G|N:D;N|118|^:^|^:^;N|166-167|A:G|N:D;N|204|^:^|^:^;N|207|A:G|N:D
												SNP	4.55	0-72|0.00	90768942	C|A	N|43|^:^|^:^;N|96|^:^|^:^;N|164|C:T|A:V;N|235|^:^|^:^
												del	8.86	0-72|0.00	90763031	TG|C	125|^:^|^:^;219-220|-:TG|-:C
27	C15orf39	Homo sapiens chromosome 15 open reading frame 39 (C15orf39) mRNA.		NM_015492	chr15	35.83	8e-05	0.46	0.2	+	4	SNP	10.52	0-72|0.00	75499062	T|F	N|15|^:^|^:^;N|24-25|^:^|^:^;N|120|^:^|^:^;N|142,144|G:T|V:F;N|164|G:T|V:F;N|235,238|^:^|^:^
												SNP	4.73	0-72|0.00	75499807	C|P	N|155,157|A:C|H:P;N|249|A:C|H:P
												SNP	7.54	17|0.46;0-16,18-72|0.00	75500713	G|C	N|12|G:T|C:F;N|75-77|G:T|C:F;N|195|^:^|^:^;N|254|^:^|^:^;N|264|^:^|^:^
												SNP	12.89	0-72|0.00	75503399	G|R	N|79-80|A:G|K:R;N|151|^:^|^:^;N|207|A:G|K:R;N|226,228|A:G|K:R;N|232,234|A:G|K:R;N|243|^:^|^:^
28	SCAPER	Homo sapiens S-phase cyclin A-associated protein in the ER (SCAPER) transcript variant 2 mRNA.		NM_001145923	chr15	20.98	9e-05	0.47	0.08	-	5	SNP	0.67	0-72|0.00	76641069	G|L	N|155|C:G|V:L;N|235|^:^|^:^
												SNP	11.82	0-72|0.00	76696901	T|H	N|36-37,39|C:T|R:H;N|164|C:T|R:H;N|210-211|C:T|R:H
												SNP	2.69	21|0.46;0-20,22-72|0.00	76726530	T|N	N|88,90-91|C:T|S:N;N|232|C:T|S:N;N|235|^:^|^:^
												SNP	3.38	2|0.01;0-1,3-72|0.00	76914159	T|Y	N|8,10|A:T|F:Y
												SNP	2.23	0-72|0.00	77067396	T|T	N|73|^:^|^:^;N|99,101|C:T|A:T;N|182|C:T|A:T;N|204|^:^|^:^
29	ZNF774	Homo sapiens zinc finger protein 774 (ZNF774) mRNA.	Transcription Factor	NM_001004309	chr15	18.16	9e-05	0.46	0.05	+	4	SNP	7.3	0-72|0.00	90903310	A|N	N|164|A:C|N:H;N|208|A:C|N:H
												SNP	1.47	0-72|0.00	90903608	T|I	N|10|^:^|^:^;N|49|^:^|^:^;N|170|^:^|^:^;N|239|C:T|T:I
												SNP	2.76	0-72|0.00	90903982	A|I	N|103-104|A:G|I:V;N|247-248|A:G|I:V;N|261|A:G|I:V
												SNP	6.49	44|0.46;0-43,45-72|0.00	90904468	C|R	N|172,174-175|C:T|R:C
30	GRAMD2	Homo sapiens GRAM domain containing 2 (GRAMD2) mRNA.		NM_001012642	chr15	18.57	0.0002	0.46	0.06	-	4	SNP	4.53	44|0.46;0-43,45-72|0.00	72454690	A|Y	N|142|^:^|^:^;N|172,174,176|A:G|Y:H
												SNP	8.69	0-72|0.00	72455757	C|G	N|21-24,26-27|C:G|G:A;N|57|^:^|^:^;N|158,160|C:G|G:A;N|204|^:^|^:^;N|227|C:G|G:A;N|241-242|C:G|G:A
												SNP	3.05	0-72|0.00	72460130	T|I	N|37-38|G:T|L:I;N|49|^:^|^:^;N|119|^:^|^:^;N|124|^:^|^:^
												SNP	2.15	0-72|0.00	72462255	C|A	N|55,58-59|C:T|A:T;N|172,174,176|C:T|A:T;N|185|^:^|^:^;N|238|^:^|^:^
31	IDH2	Homo sapiens isocitrate dehydrogenase 2 (NADP+) mitochondrial (IDH2) nuclear gene encoding mitochondrial protein mRNA.		NM_002168	chr15	22.11	0.0002	0.06	0.2	-	3	SNP	14.05	0-72|0.00	90627553	G|T	N|3,5|A:G|M:T;N|71|A:G|M:T;N|82|^:^|^:^;N|141,144|A:G|M:T;N|178,180|A:G|M:T;N|199|^:^|^:^
												SNP	6.09	35|0.06;0-34,36-72|0.00	90630704	C|R	N|145,148|C:T|R:H
												SNP	3.68	0-72|0.00	90645510	T|H	N|7-9|C:T|R:H;N|19|^:^|^:^;N|23,25-26|^:^|^:^;N|43|^:^|^:^;N|54|^:^|^:^;N|60|^:^|^:^;N|73|^:^|^:^;N|151|^:^|^:^;N|156|^:^|^:^;N|195|^:^|^:^;N|204|^:^|^:^;N|213|^:^|^:^;N|228|^:^|^:^;N|238|^:^|^:^;N|243|^:^|^:^;N|265|^:^|^:^
32	SV2B	Homo sapiens synaptic vesicle glycoprotein 2B (SV2B) transcript variant 1 mRNA.	Neurological system process;Neurontransmitter Secretion	NM_014848	chr15	14.93	0.0002	0.3	0.07	+	2	SNP	1.66	52|0.30;0-51,53-72|0.00	91769533	G|A	N|142|^:^|^:^;N|203-205|A:G|T:A
												SNP	13.55	0-72|0.00	91827271	A|I	N|6|^:^|^:^;N|111,114|A:G|I:V;N|155,157|A:G|I:V;N|177,180|A:G|I:V;N|196,198-199|A:G|I:V;N|239|A:G|I:V
33	ANKRD34C	Homo sapiens ankyrin repeat domain 34C (ANKRD34C) mRNA.		NM_001146341	chr15	21.4	0.0003	0.82	0.02	+	6	SNP	0.6	0-72|0.00	79585912	A|R	N|159-160|A:G|R:G
												SNP	5.28	0-72|0.00	79586159	A|D	N|122-123|^:^|^:^;N|236,238|A:G|D:G
												SNP	5.39	0-72|0.00	79586369	A|K	N|82,84|A:T|K:M;N|170|^:^|^:^
												SNP	0.77	0-72|0.00	79586737	T|S	N|0,2|C:T|P:S;N|8|^:^|^:^;N|94|^:^|^:^;N|125|^:^|^:^;N|238|^:^|^:^
												SNP	2.64	14|0.21;0-13,15-72|0.00	79586782	C|P	N|63|C:G|P:A
												del	4.96	1|0.60;0,2-72|0.00	79586693	GTG|CG	3,5-6|-:GTG|-:CG;146,148|-:GTG|-:CG
34	FSD2	Homo sapiens fibronectin type III and SPRY domain containing 2 (FSD2) mRNA.		NM_001007122	chr15	18.71	0.0004	0.37	0.09	-	4	SNP	5.11	0-72|0.00	83430990	G|H	N|70|^:^|^:^;N|164|A:G|Y:H;N|238|^:^|^:^
												SNP	5.39	0-72|0.00	83447533	T|I	N|111-113|C:T|V:I;N|138,140|C:T|V:I
												SNP	5.34	45|0.09;0-44,46-72|0.00	83455676	C|R	N|177-179|C:T|R:H;N|238|^:^|^:^
												SNP	3.15	49|0.28;0-48,50-72|0.00	83455758	C|A	N|193,195|C:G|A:P
35	MESP2	Homo sapiens mesoderm posterior 2 homolog (mouse) (MESP2) mRNA.		NM_001039958	chr15	15.37	0.0005	0.91	0.003	+	2	SNP	9.42	0-72|0.00	90320000	G|V	N|124|^:^|^:^;N|135|^:^|^:^;N|161-162|A:G|M:V;N|164|A:G|M:V;N|165|^:^|^:^;N|170|^:^|^:^;N|178|^:^|^:^;N|195|^:^|^:^;N|238|^:^|^:^
												SNP	3.77	24|0.91;0-23,25-72|0.00	90320105	G|A	N|72-73|^:^|^:^;N|80|^:^|^:^;N|102,104|G:T|A:S;N|195|^:^|^:^;N|236,238|^:^|^:^
36	NEIL1	Homo sapiens nei endonuclease VIII-like 1 (E. coli) (NEIL1) mRNA.		NM_024608	chr15	18.9	0.0008	0.06	0.1	+	3	SNP	7.47	0-72|0.00	75641494	G|G	N|60|^:^|^:^;N|155,157|A:G|D:G;N|249|A:G|D:G
												SNP	10.63	0-72|0.00	75641682	T	N|0-1|C:T;N|71|^:^;N|178,180|C:T;N|182|C:T;N|214,216|^:^
												SNP	2.52	35|0.06;0-34,36-72|0.00	75647073	G|R	N|118|^:^|^:^;N|145,148|A:G|Q:R
37	ZNF592	Homo sapiens zinc finger protein 592 (ZNF592) mRNA.	Transcription Factor	NM_014630	chr15	16.99	0.001	0.09	0.1	+	2	SNP	14.55	0-72|0.00	85326955	G|R	N|26|^:^|^:^;N|159|A:G|H:R;N|172,174-175|A:G|H:R;N|184,187-188|A:G|H:R;N|185|^:^|^:^;N|199|^:^|^:^;N|222|A:A|H:H;N|221|A:G|H:R
												SNP	4.02	72|0.09;0-71|0.00	85327633	C|A	N|170|^:^|^:^;N|268-269,271|C:T|A:V
38	RASGRF1	Homo sapiens Ras protein-specific guanine nucleotide-releasing factor 1 (RASGRF1) transcript variant 2 mRNA.		NM_001145648	chr15	20.58	0.001	0.7	0.07	-	3	SNP	7.69	38|0.27;0-22,24-37,39-72|0.00;23|-0.03	79284127	C|V	N|6|^:^|^:^;N|99,101|A:C|L:V;N|112|^:^|^:^;N|120|^:^|^:^;N|155-156|A:C|L:V;N|183|A:C|L:V;N|218|A:C|L:V
												SNP	5.83	21|0.46;0-20,22-72|0.00	79296192	C|D	N|36|^:^|^:^;N|88,90-91|C:T|D:N;N|93|^:^|^:^;N|197|^:^|^:^;N|238|^:^|^:^
												SNP	5.83	0-72|0.00	79296386	C|S	N|43|^:^|^:^;N|48-49,54|C:T|S:N;N|75-77|C:T|S:N;N|93|^:^|^:^;N|114|^:^|^:^;N|127|^:^|^:^;N|197|^:^|^:^
39	LMAN1L	Homo sapiens lectin mannose-binding 1 like (LMAN1L) mRNA.		NM_021819	chr15	17.23	0.002	0.1	0.2	+	2	SNP	10.22	0-72|0.00	75111530	G|G	N|137|A:G|D:G;N|264-265|A:G|D:G
												SNP	8.55	30,33|0.05;0-29,31-32,34-72|0.00	75113460	C|R	N|52|^:^|^:^;N|129-130|C:T|R:W;N|138,140|C:T|R:W;N|213|^:^|^:^
40	KLHL25	Homo sapiens kelch-like 25 (Drosophila) (KLHL25) mRNA.	Nervous System Development	NM_022480	chr15	18.72	0.002	0.07	0.1	-	3	SNP	8.21	0-72|0.00	86312177	G|R	N|204|^:^|^:^;N|207|A:G|W:R;N|243|^:^|^:^
												SNP	5.19	43|0.07;0-42,44-72|0.00	86312198	C|V	N|14|^:^|^:^;N|55|^:^|^:^;N|60|^:^|^:^;N|122|^:^|^:^;N|169-170|C:T|V:M;N|243|^:^|^:^
												SNP	6.98	0-72|0.00	86312273	T|M	N|3|A:T|L:M;N|43|^:^|^:^;N|152|A:T|L:M;N|162|A:T|L:M;N|219-220|A:T|L:M;N|223-225|A:T|L:M;N|238|^:^|^:^
41	CPEB1	Homo sapiens cytoplasmic polyadenylation element binding protein 1 (CPEB1) transcript variant 3 mRNA.		NM_030594	chr15	11.36	0.002	0.79	0.007	-	2	SNP	5.67	31|0.19;0-30,32-72|0.00	83240107	G|S	N|135-136|G:T|S:R
												SNP	4.07	50|0.60;0-49,51-72|0.00	83296111	T|E	N|27|^:^|^:^;N|196,199|G:T|A:E
42	MFGE8	Homo sapiens milk fat globule-EGF factor 8 protein (MFGE8) transcript variant 1 mRNA.	Nervous System Development;Neurological system process	NM_005928	chr15	14.41	0.004	0.5	0.06	-	4	SNP	6.12	29|0.50;0-28,30-72|0.00	89442723	T|N	N|32|^:^|^:^;N|67|^:^|^:^;N|125-126,128|A:T|I:N;N|161|^:^|^:^;N|170|^:^|^:^;N|197|^:^|^:^;N|256|^:^|^:^
												SNP	2.55	0-72|0.00	89444806	G|S	N|6|^:^|^:^;N|48|^:^|^:^;N|55|^:^|^:^;N|93|^:^|^:^;N|184|^:^|^:^;N|214|^:^|^:^;N|229-230|C:G|R:S;N|238|^:^|^:^
												SNP	1.96	2|0.01;0-1,3-72|0.00	89453043	G|A	N|8,10|A:G|V:A;N|254|^:^|^:^
												SNP	3.47	0-72|0.00	89456540	G|P	N|80|^:^|^:^;N|195|^:^|^:^;N|196-197|A:G|L:P;N|238|^:^|^:^;N|244|^:^|^:^;N|259|^:^|^:^
43	TBC1D2B	Homo sapiens TBC1 domain family member 2B (TBC1D2B) transcript variant 1 mRNA.		NM_144572	chr15	11.33	0.006	0.31	0.09	-	4	SNP	1.64	0-72|0.00	78290630	C|A	N|142|^:^|^:^;N|249|C:T|A:T;N|253-254,256|C:T|A:T
												SNP	0	42|0.30;0-41,43-72|0.00	78317696	C|V	N|55,59|^:^|^:^;N|165,167-168|C:T|V:I
												SNP	5.51	0-72|0.00	78317837	C|V	N|37-38|C:G|V:L;N|94|C:G|V:L;N|128|^:^|^:^;N|153|C:G|V:L;N|213|^:^|^:^;N|241|^:^|^:^
												SNP	4.76	60|0.01;0-59,61-72|0.00	78346479	C|K	N|230-231|A:C|N:K;N|268|^:^|^:^
44	MPI	Homo sapiens mannose phosphate isomerase (MPI) mRNA.		NM_002435	chr15	6.79	0.008	0.65	0.03	+	1	SNP	3.78	24|0.71;0-23,25-65,67-72|0.00;66|-0.06	75182424	C|P	N|71|^:^|^:^;N|88|^:^|^:^;N|102,104|C:T|P:S;N|125|C:T|P:S;N|206|C:T|P:S;N|238|^:^|^:^;N|247,249|C:T|P:S
45	C15orf38	Homo sapiens chromosome 15 open reading frame 38 (C15orf38) mRNA.		NM_001199058	chr15	10.38	0.009	0.31	0.05	-	2	SNP	7.03	48|0.30;0-47,49-72|0.00	90380921	C|G	N|116|^:^|^:^;N|190,192|A:C|W:G;N|213|^:^|^:^
												SNP	3.93	18|0.01;0-17,19-72|0.00	90447114	C|D	N|3|^:^|^:^;N|79-80|C:T|D:N
46	LINGO1	Homo sapiens leucine rich repeat and Ig domain containing 1 (LINGO1) mRNA.	Nervous System Development;Neurological system process	NM_032808	chr15	7.33	0.02	0.3	0.05	-	2	SNP	3.74	0-72|0.00	77906639	C|G	N|42-43|^:^|^:^;N|258,260|C:G|G:A;N|266|^:^|^:^
												SNP	4.21	71|0.30;0-70,72|0.00	77907693	C|A	N|20|^:^|^:^;N|55|^:^|^:^;N|254|^:^|^:^;N|264,266-267|C:T|A:T
47	COX5A	Homo sapiens cytochrome c oxidase subunit Va (COX5A) nuclear gene encoding mitochondrial protein mRNA.		NM_004255	chr15	1.42	0.02	0.3	0.02	-	1	SNP	0.04	71|0.30;0-70,72|0.00	75230282	G|S	N|70|^:^|^:^;N|151|^:^|^:^;N|195|^:^|^:^;N|217|^:^|^:^;N|228|^:^|^:^;N|238|^:^|^:^;N|264,266-267|C:G|C:S
48	HAPLN3	Homo sapiens hyaluronan and proteoglycan link protein 3 (HAPLN3) mRNA.	Nervous System Development	NM_178232	chr15	7.49	0.03	0.09	0.09	-	2	SNP	2.55	7|0.09;0-6,8-72|0.00	89424676	A|D	N|29-30|A:T|D:E
												SNP	6.54	0-72|0.00	89424870	G|R	N|172,176|G:T|R:S
49	IREB2	Homo sapiens iron-responsive element binding protein 2 (IREB2) mRNA.		NM_004136	chr15	4.68	0.04	0.21	0.05	+	2	SNP	3.71	0-72|0.00	78764138	C|A	N|243,246|C:T|A:V
												SNP	1.16	19|0.21;0-18,20-72|0.00	78789534	A|I	N|82-83|A:G|I:V;N|259|A:G|I:V
50	AEN	Homo sapiens apoptosis enhancing nuclease (AEN) mRNA.		NM_022767	chr15	2.85	0.06	0.3	0.05	+	2	SNP	1.47	71|0.30;0-70,72|0.00	89169954	G|V	N|150|C:G|L:V;N|243|^:^|^:^;N|264,266-267|C:G|L:V
												SNP	0	71|0.30;0-70,72|0.00	89173398	G|C	N|150|A:G|Y:C;N|214|^:^|^:^;N|264,266-267|A:G|Y:C
51	TLE3	Homo sapiens transducin-like enhancer of split 3 (E(sp1) homolog Drosophila) (TLE3) transcript variant 3 mRNA.	Wnt Signaling Pathway;Transcription Factor	NM_005078	chr15	3.95	0.06	0.06	0.07	-	1	SNP	3.67	35|0.06;0-34,36-72|0.00	70347482	G|T	N|24|^:^|^:^;N|57|^:^|^:^;N|81|A:G|M:T;N|124|^:^|^:^;N|145,148|A:G|M:T;N|167|^:^|^:^;N|213|^:^|^:^
52	LOXL1	Homo sapiens lysyl oxidase-like 1 (LOXL1) mRNA.	Neurological system process	NM_005576	chr15	3.65	0.07	0.01	0.07	+	1	ins	3.62	2|0.01;0-1,3-72|0.00	74219903	-|-	8,10|-:GCC|-:A
53	SEMA7A	Homo sapiens semaphorin 7A GPI membrane anchor (John Milton Hagen blood group) (SEMA7A) transcript variant 3 mRNA.	Nervous System Development	NM_003612	chr15	3.98	0.07	0.28	0.08	-	2	SNP	0.97	0-72|0.00	74710638	A|S	N|18|^:^|^:^;N|125|^:^|^:^;N|264-265|A:T|S:T
												SNP	2.69	49|0.28;0-48,50-72|0.00	74711147	G|R	N|193,195|A:G|C:R
54	NTRK3	Homo sapiens neurotrophic tyrosine kinase receptor type 3 (NTRK3) transcript variant 3 mRNA.	Nervous System Development	NM_002530	chr15	5.38	0.07	0.09	0.09	-	1	SNP	4.98	72|0.09;0-71|0.00	88472622	G|R	N|89,91|A:G|C:R;N|268-269,271|A:G|C:R
55	ISLR	Homo sapiens immunoglobulin superfamily containing leucine-rich repeat (ISLR) transcript variant 2 mRNA.		NM_201526	chr15	3.68	0.09	0.03	0.1	+	2	SNP	3.55	0-72|0.00	74467942	G|R	N|58|^:^|^:^;N|73|^:^|^:^;N|137|A:G|Q:R;N|238|^:^|^:^
												SNP	0.24	20|0.03;0-19,21-72|0.00	74468266	G|G	N|3|C:G|A:G;N|27|^:^|^:^;N|73|^:^|^:^;N|85-86|C:G|A:G;N|238|^:^|^:^

## Sheet: TableS1b
Table S1b: Summary of Language Impairment Recessive Candidate Variants
Rank	Gene	FullName	Found in Pathway	mRNA	Chr	Score	PValue	LOD_Score	LOD_PValue	Strand	#ofVar	VarType	VarScore	VarLODScore	VarPosition	Ref	GenoType
1	AKAP13	Homo sapiens A kinase (PRKA) anchor protein 13 (AKAP13) transcript variant 3 mRNA.		NM_007200	chr15	134.44	1e-06	2.27	0.0002	+	17	SNP	6.77	52|0.602060175452597;27|0.602059999132221;35|0.601487688587314;40|0.60119143145774;0-26,28-34,36-39,41-51,53-72|0	86076848	T|L	N|104-105|C:T|P:L
												SNP	16.73	52|0.602060175452597;27|0.602059999132221;35|0.601487688587314;40|0.60119143145774;0-26,28-34,36-39,41-51,53-72|0	86087095	G|G	N|28|A:G|R:G;N|66,68|A:G|R:G;N|190-191,193|A:G|R:G;N|250-251|A:G|R:G
												SNP	4.74	52|0.602060175452597;27|0.602059999132221;35|0.601487688587314;40|0.60119143145774;0-26,28-34,36-39,41-51,53-72|0	86122299	G|E	N|80|^:^|^:^;N|153|^:^|^:^;N|205-206|A:G|K:E
												SNP	10.37	52|0.602060175452597;27|0.602059999132221;35|0.601487688587314;40|0.60119143145774;0-26,28-34,36-39,41-51,53-72|0	86122875	A|K	N|6|^:^|^:^;N|16|A:C|K:Q;N|40|A:C|K:Q;N|41-42|A:C|K:Q;N|151|^:^|^:^;N|165,167|A:C|K:Q;N|197|^:^|^:^;N|209,211,213|A:C|K:Q;N|228|A:C|K:Q;N|237|A:C|K:Q;N|243,245-248|A:C|K:Q
												SNP	0	52|0.602060175452597;27|0.602059999132221;35|0.601487688587314;40|0.60119143145774;0-26,28-34,36-39,41-51,53-72|0	86122966	G|S	N|181-182|A:G|N:S
												SNP	1.58	52|0.602060175452597;27|0.602059999132221;35|0.601487688587314;40|0.60119143145774;0-26,28-34,36-39,41-51,53-72|0	86123085	A|K	N|136|^:^|^:^;N|140|A:G|K:E
												SNP	1.08	52|0.602060175452597;27|0.602059999132221;35|0.601487688587314;40|0.60119143145774;0-26,28-34,36-39,41-51,53-72|0	86123770	A|Y	N|32|^:^|^:^;N|76|^:^|^:^;N|183-184|A:T|Y:F;N|189|^:^|^:^
												SNP	3.09	52|0.602060175452597;27|0.602059999132221;35|0.601487688587314;40|0.60119143145774;0-26,28-34,36-39,41-51,53-72|0	86123809	C|T	N|76|^:^|^:^;N|180,182|C:T|T:M
												SNP	27.18	52|0.602060175452597;27|0.602059999132221;35|0.601487688587314;40|0.60119143145774;0-26,28-34,36-39,41-51,53-72|0	86123851	C|S	N|11,13|C:T|S:F;N|76,79-80|C:T|S:F;N|100-102|C:T|S:F;N|105-106|C:T|S:F;N|128,130|C:T|S:F;N|131|C:T|S:F;N|143|C:T|S:F;N|146|C:T|S:F;N|202,204|C:T|S:F
												SNP	14.45	52|0.602060175452597;40|0.600756484903633;0-39,41-51,53-72|0	86124616	A|E	N|4-6|A:G|E:G;N|77-78,80|A:G|E:G;N|99|A:G|E:G;N|102|A:G|E:G;N|160|A:G|E:G;N|174-175|A:G|E:G;N|190|^:^|^:^;N|199,201|A:G|E:G;N|202|A:G|E:G;N|233|^:^|^:^
												SNP	22.42	52|0.602060175452597;27|0.602059999132221;35|0.601487688587314;40|0.60119143145774;0-26,28-34,36-39,41-51,53-72|0	86124712	A|D	N|0-1|A:G|D:G;N|51,53|A:G|D:G;N|55,57|A:G|D:G;N|73,75|A:G|D:G;N|84-85|A:G|D:G;N|92|A:G|D:G;N|118,120|A:G|D:G;N|121|A:G|D:G;N|177|A:G|D:G;N|236|A:G|D:G
												SNP	2.03	52|0.602060175452597;27|0.602059999132221;35|0.601487688587314;40|0.60119143145774;0-26,28-34,36-39,41-51,53-72|0	86198846	A|S	N|140|A:G|S:G;N|189|^:^|^:^
												SNP	3.92	52|0.602060175452597;27|0.602059999132221;35|0.601487688587314;40|0.60119143145774;0-26,28-34,36-39,41-51,53-72|0	86198852	C|P	N|183|^:^|^:^;N|189|^:^|^:^;N|238,240|C:T|P:S
												SNP	3.55	52|0.602060175452597;27|0.602059999132221;35|0.601487688587314;40|0.60119143145774;0-26,28-34,36-39,41-51,53-72|0	86236622	C|P	N|123-124|C:G|P:A
												SNP	1.77	52|0.602060175452597;27|0.602059999132221;35|0.601487688587314;40|0.60119143145774;0-26,28-34,36-39,41-51,53-72|0	86259072	G|A	N|78|^:^|^:^;N|176|^:^|^:^;N|214|^:^|^:^;N|224|^:^|^:^;N|241|^:^|^:^;N|258|A:G|T:A
												SNP	2.38	52|0.602060175452597;27|0.602059999132221;35|0.601487688587314;40|0.60119143145774;0-26,28-34,36-39,41-51,53-72|0	86273745	A|E	N|180,182|A:C|E:D
												SNP	5.27	52|0.602060175452597;27|0.602059999132221;35|0.601487688587314;40|0.60119143145774;0-26,28-34,36-39,41-51,53-72|0	86283483	G|E	N|99|^:^|^:^;N|131|A:G|K:E;N|154|^:^|^:^
2	LMAN1L	Homo sapiens lectin mannose-binding 1 like (LMAN1L) mRNA.		NM_021819	chr15	22.74	0.009	0.61	0.006	+	3	SNP	10.47	36|0.62386813169345;0-35,37-72|0	75111530	G|G	N|132|A:G|D:G;N|205-206|A:G|D:G
												SNP	8.8	36|0.62386813169345;0-35,37-72|0	75113460	C|R	N|81-82|C:T|R:W;N|153|^:^|^:^;N|238,240|C:T|R:W;N|247|^:^|^:^
												SNP	2.83	36|0.62386813169345;0-35,37-72|0	75116009	C|L	N|54|^:^|^:^;N|132|C:T|L:F;N|147|^:^|^:^
3	AGPHD1	Homo sapiens aminoglycoside phosphotransferase domain containing 1 (AGPHD1) transcript variant 1 mRNA.		NM_001083612	chr15	16	0.03	0.13	0.03	+	2	SNP	15.42	55|0.125228519819984;0-54,56-72|0	78807407	T|Y	N|76|^:^|^:^;N|97|^:^|^:^;N|111|A:T|*:Y;N|192-193|A:T|*:Y;N|190-191|A:A|*:*;N|208|^:^|^:^;N|235|^:^|^:^
												SNP	0.3	0-72|0	78819849	A|H	N|214,217|A:G|H:R;N|220|^:^|^:^
4	PEAK1	Homo sapiens NKF3 kinase family member (PEAK1) mRNA.		NM_024776	chr15	26.43	0.03	0.6	0.02	-	5	SNP	9.97	37|0.615687654105364;0-36,38-72|0	77407516	G|P	N|133|G:T|P:Q;N|149-152|G:T|P:Q
												SNP	1.29	37|0.615687654105364;0-36,38-72|0	77425697	T|I	N|133|C:T|V:I;N|204|^:^|^:^
												SNP	7.11	37|0.615687654105364;0-36,38-72|0	77471361	G|R	N|34|^:^|^:^;N|69,71|A:G|C:R
												SNP	4.59	37|0.615687654105364;0-36,38-72|0	77471894	C|S	N|67|A:C|I:S;N|106|A:C|I:S;N|116|A:C|I:S;N|260-261|A:C|I:S
												SNP	3.46	37|0.615687654105364;0-36,38-72|0	77472951	A|S	N|149-152|A:G|S:P
5	SCAPER	Homo sapiens S-phase cyclin A-associated protein in the ER (SCAPER) transcript variant 2 mRNA.		NM_020843	chr15	24.88	0.03	0.6	0.007	-	6	SNP	0.81	37|0.615687654105364;0-36,38-72|0	76641069	G|L	N|162|C:G|V:L;N|186|^:^|^:^
												SNP	12.21	37|0.615687654105364;0-36,38-72|0	76696901	T|H	N|122-123,125|C:T|R:H;N|133|C:T|R:H;N|166-167|C:T|R:H
												SNP	2.83	37|0.615687654105364;0-36,38-72|0	76726530	T|N	N|36,38-39|C:T|S:N;N|66|C:T|S:N;N|186|^:^|^:^
												SNP	3.51	37|0.615687654105364;0-36,38-72|0	76914159	T|Y	N|11,13|A:T|F:Y
												SNP	2.36	37|0.615687654105364;0-36,38-72|0	77067396	T|T	N|97|^:^|^:^;N|119|C:T|A:T;N|199,201|C:T|A:T;N|204|^:^|^:^
												SNP	3.1	37|0.615687654105364;0-36,38-72|0	77134238	G|T	N|133|A:G|M:T;N|159|^:^|^:^;N|190|^:^|^:^;N|220|^:^|^:^
6	KIAA1199	Homo sapiens KIAA1199 (KIAA1199) mRNA.		NM_018689	chr15	63.12	0.05	0.59	0.02	+	10	SNP	8.3	10|0.606180796827996;0-9,11-72|0	81187427	C|R	N|59|^:^|^:^;N|118,120|C:T|R:W
												SNP	6	10|0.606180796827996;0-9,11-72|0	81212511	T|F	N|137,139|C:T|S:F;N|207|^:^|^:^;N|245|^:^|^:^
												SNP	0	10|0.606180796827996;0-9,11-72|0	81212585	A|M	N|58|^:^|^:^;N|132|A:T|M:L;N|153|^:^|^:^
												SNP	7.6	10|0.606180796827996;0-9,11-72|0	81221512	G|G	N|4|A:G|D:G;N|56|A:G|D:G;N|203-204|A:G|D:G
												SNP	1.78	10|0.606180796827996;0-9,11-72|0	81229192	G|A	N|76|^:^|^:^;N|127|^:^|^:^;N|177|^:^|^:^;N|205-206|A:G|T:A
												SNP	1.78	10|0.606180796827996;0-9,11-72|0	81229201	G|A	N|35|^:^|^:^;N|44-45|A:G|T:A;N|204|^:^|^:^
												SNP	11.73	10|0.606180796827996;0-9,11-72|0	81230310	G|E	N|181-182|A:G|K:E;N|215,217|A:G|K:E
												SNP	5.46	10|0.606180796827996;0-9,11-72|0	81234604	C|H	N|87,89|C:T|H:Y;N|123|^:^|^:^;N|151|^:^|^:^
												SNP	5.46	10|0.606180796827996;0-9,11-72|0	81241174	G|R	N|18,20|A:G|Q:R;N|204|^:^|^:^;N|214|^:^|^:^
												del	18.21	10|0.606180796827996;0-9,11-72|0	81241247	GAA|VK	44,46|-:GAA|-:VK;50|^:^|^:^;116|-:GAA|-:VK;128,130|-:GAA|-:VK;143|^:^|^:^;166|-:GAA|-:VK;190-191,193|-:GAA|-:VK;241-242,244-245,247-248|-:GAA|-:VK
7	ADAMTSL3	Homo sapiens ADAMTS-like 3 (ADAMTSL3) mRNA.	Nervous System Development	NM_207517	chr15	59.17	0.05	0.57	0.02	+	10	SNP	6.63	40|0.601756211536539;0-39,41-72|0	84506964	A|K	N|36,38-39|A:G|K:E;N|140|A:G|K:E;N|220|^:^|^:^
												SNP	0.64	40|0.601625942847251;0-39,41-72|0	84561468	T|V	N|47,49|C:T|A:V;N|189|^:^|^:^
												SNP	1.91	40|0.601669370085546;0-39,41-72|0	84568467	G|A	N|81,83|G:T|A:S
												SNP	6.26	40|0.601756211536539;0-39,41-72|0	84611703	C|R	N|11|^:^|^:^;N|122,124,126|C:T|R:W
												SNP	2.44	40|0.601669370085546;0-39,41-72|0	84611805	C|P	N|49|C:T|P:S;N|76,79-80|C:T|P:S;N|164|C:T|P:S
												SNP	2.75	40|0.601669370085546;0-39,41-72|0	84651057	G|E	N|59|^:^|^:^;N|76|^:^|^:^;N|104|A:G|K:E;N|166|A:G|K:E;N|228|A:G|K:E;N|241-242,244-245,247-248|A:G|K:E;N|252|A:G|K:E
												SNP	6.32	40|0.601756211536539;0-39,41-72|0	84651321	C|R	N|18,21|C:T|R:W;N|97|^:^|^:^
												SNP	4.74	40|0.601669370085546;0-39,41-72|0	84683428	A|T	N|132|A:G|T:A;N|203|^:^|^:^;N|205-206|A:G|T:A
												SNP	14.85	40|0.601669370085546;0-39,41-72|0	84700108	C|R	N|67-68|C:T|R:C;N|118-119|C:T|R:C;N|137-138|C:T|R:C;N|223-224,226-227|C:T|R:C
												SNP	0	40|0.601756211536539;0-39,41-72|0	84705645	C|I	N|140|C:G|I:M
8	C15orf39	Homo sapiens chromosome 15 open reading frame 39 (C15orf39) mRNA.		NM_015492	chr15	40.22	0.08	0.56	0.01	+	5	SNP	10.77	2|0.602059999132221;0-1,3-72|0	75499062	T|F	N|23|^:^|^:^;N|32-33|^:^|^:^;N|133|G:T|V:F;N|159,161|G:T|V:F;N|186,189|^:^|^:^;N|218|^:^|^:^
												SNP	4.85	2|0.602059999132221;0-1,3-72|0	75499807	C|P	N|114|A:C|H:P;N|162,164|A:C|H:P
												SNP	7.67	2|0.602059999132221;0-1,3-72|0	75500713	G|C	N|51|^:^|^:^;N|94|G:T|C:F;N|139|^:^|^:^;N|205|^:^|^:^;N|210-212|G:T|C:F
												SNP	13.41	2|0.602059999132221;0-1,3-72|0	75503399	G|R	N|7-8|A:G|K:R;N|66,68|A:G|K:R;N|131|A:G|K:R;N|143|^:^|^:^;N|176|^:^|^:^;N|250,252|A:G|K:R
												ins	5.76	2|0.602059999132221;0-1,3-72|0	75500608	-|-	7,9|-:TCCAGC|-:SS;43|-:TCCAGC|-:SS

## Sheet: TableS1c
Table S1c: Summary of Reading Impairment Dominant Candidate Variants
Rank	Gene	FullName	Found in Pathway	mRNA	Chr	Score	PValue	LOD_Score	LOD_PValue	Strand	#ofVar	VarType	VarScore	VarLODScore	VarPosition	Ref	GenoType
1	DNAH3	Homo sapiens dynein axonemal heavy chain 3 (DNAH3) mRNA.	Huntington Disease	NM_017539	chr16	153.02	1e-06	1.17	0.2	-	16	SNP	3.77	0-72|0.00	20966308	T|N	N|261-262|C:T|S:N
												SNP	30.55	0-72|0.00	20974740	C|R	N|23|C:T|R:Q;N|51,53-55|C:T|R:Q;N|56,58|C:T|R:Q;N|66,68|C:T|R:Q;N|92,94|C:T|R:Q;N|128,130|C:T|R:Q;N|153|C:T|R:Q;N|168-169,172|C:T|R:Q;N|175|^:^|^:^;N|202-203|C:T|R:Q;N|227-228,230|C:T|R:Q
												SNP	16.38	0-72|0.00	20975505	T|H	N|3,5|C:T|R:H;N|20|C:T|R:H;N|32|^:^|^:^;N|40|C:T|R:H;N|60-61|C:T|R:H;N|101-102|C:T|R:H;N|183-185,188-189|C:T|R:H;N|241-243|C:T|R:H;N|265|C:T|R:H;N|268|^:^|^:^
												SNP	10.18	24|0.31;0-23,25-31,33-72|0.00;32|-0.03	20994160	G|P	N|88-89|A:G|L:P;N|115,117|A:G|L:P;N|129|^:^|^:^;N|219|^:^|^:^
												SNP	7.88	56|0.46;0-55,57-72|0.00	21008629	C|G	N|199|^:^|^:^;N|209,211-212|C:T|G:R
												SNP	1.84	13|0.42;0-12,14-72|0.00	21031053	C|R	N|42-43,45|C:T|R:K;N|254|^:^|^:^
												SNP	1.15	0-72|0.00	21042411	T|I	N|4-5|C:T|V:I;N|19-20|C:T|V:I
												SNP	8.08	0-72|0.00	21048162	T|I	N|6,8-9|C:T|M:I;N|32|^:^|^:^;N|129|^:^|^:^;N|232-235|C:T|M:I
												SNP	9.89	0-72|0.00	21049155	A|S	N|47,50|A:C|S:R;N|76|^:^|^:^;N|78-80,82|A:C|S:R
												SNP	9.31	0-72|0.00	21049286	C|V	N|74|C:T|V:I;N|105|C:T|V:I;N|156|^:^|^:^;N|191|C:T|V:I;N|221,223-224,226|C:T|V:I;N|267|T:T|I:I
												SNP	14.42	0-72|0.00	21073933	G|P	N|72|A:G|L:P;N|183-184,186-188|A:G|L:P;N|214-215|A:G|L:P
												SNP	10.77	0-72|0.00	21098323	C|R	N|11-12|C:G|R:S;N|64|^:^|^:^;N|167|C:G|R:S;N|180|C:G|R:S;N|222|^:^|^:^
												SNP	2.55	0-72|0.00	21123123	C|K	N|32|^:^|^:^;N|65|A:C|N:K;N|205-206,208|A:C|N:K
												SNP	9.04	0-72|0.00	21123315	G|T	N|157,159-160|A:G|M:T;N|210,212|A:G|M:T;N|265-266|A:G|M:T
												SNP	15.76	0-72|0.00	21133339	G|S	N|32|^:^|^:^;N|95-96|A:G|F:S;N|127-129,131|A:G|F:S;N|147-148|A:G|F:S;N|258-259|A:G|F:S
												SNP	0	63|0.26;0-62,64-72|0.00	21151939	G|P	N|64|^:^|^:^;N|181|^:^|^:^;N|242|A:G|L:P
2	TNRC6A	Homo sapiens trinucleotide repeat containing 6A (TNRC6A) mRNA.		NM_014494	chr16	73.61	1e-06	1.06	0.05	+	9	SNP	10.31	0-72|0.00	24788389	A|Q	N|4-5|A:C|Q:P;N|32|^:^|^:^;N|74|A:C|Q:P;N|79|^:^|^:^;N|105|A:C|Q:P;N|191|A:C|Q:P
												SNP	5.9	13|0.55;0-12,14-72|0.00	24800831	G|G	N|42-44|A:G|S:G
												SNP	4.37	0-72|0.00	24800897	C|P	N|131|C:T|P:S;N|268,271|C:T|P:S
												SNP	0.85	0|0.30;1-72|0.00	24801806	G|V	N|0,2|A:G|I:V;N|98|A:G|I:V;N|112|^:^|^:^;N|262|^:^|^:^
												SNP	7.9	0-72|0.00	24802367	G|G	N|6|^:^|^:^;N|43|^:^|^:^;N|72|C:G|R:G;N|153|^:^|^:^;N|260|^:^|^:^
												SNP	24.22	0-72|0.00	24804954	A|Q	N|6,8-9|A:T|Q:H;N|42-43|A:T|Q:H;N|45|T:T|H:H;N|71|A:T|Q:H;N|83|^:^|^:^;N|105|A:T|Q:H;N|108,110|A:T|Q:H;N|143-144|A:T|Q:H;N|146,148|A:T|Q:H;N|152|A:T|Q:H;N|168,170,172|A:T|Q:H;N|174-175|A:T|Q:H;N|236,238|A:T|Q:H
												SNP	3.78	63|0.21;0-62,64-72|0.00	24828224	A|N	N|88|^:^|^:^;N|235|^:^|^:^;N|240-241,243|A:G|N:S
												del	7.77	0-72|0.00	24788396	GCAGCCGCAGCAGCAGCAGCCACAGCAGCAGCCACAGCC|QQPQQQQPQQQPQP	32|^:^|^:^;79|^:^|^:^;135|^:^|^:^;150,152|-:GCAGCCGCAGCAGCAGCAGCCACAGCAGCAGCCACAGCC|-:QQPQQQQPQQQPQP;192|^:^|^:^;210|^:^|^:^
												ins	5.63	0-72|0.00	24788440	-|-	56,58|-:GCAGCA|-:AA
3	ACSM2B	Homo sapiens acyl-CoA synthetase medium-chain family member 2B (ACSM2B) nuclear gene encoding mitochondrial protein transcript variant 1 mRNA.		NM_001105069	chr16	65.89	1e-06	0.3	0.2	-	6	SNP	0	45|0.30;0-44,46-72|0.00	20551987	A|Y	N|137|^:^|^:^;N|156|^:^|^:^;N|162-163|A:T|Y:N
												SNP	4.13	0-72|0.00	20554295	T|K	N|2|^:^|^:^;N|42-43,45|C:T|E:K;N|64|C:T|E:K;N|63|^:^|^:^
												SNP	12.63	0-72|0.00	20554524	C|G	N|161|^:^|^:^;N|162|A:C|*:G;N|219|^:^|^:^
												SNP	17.8	0-72|0.00	20554582	T|E	N|46|^:^|^:^;N|63-64|G:T|D:E;N|95,97|G:T|D:E;N|161|^:^|^:^;N|191|G:T|D:E;N|209|^:^|^:^;N|219|^:^|^:^;N|221,223-224,226|G:T|D:E;N|229|^:^|^:^;N|240|^:^|^:^;N|254|G:T|D:E;N|267|^:^|^:^
												SNP	29.39	0-72|0.00	20559726	C|D	N|23|^:^|^:^;N|33|^:^|^:^;N|39-40|C:T|D:N;N|132,135|C:T|D:N;N|161|^:^|^:^;N|192-196|C:T|D:N;N|200,203|C:T|D:N;N|219|^:^|^:^;N|236,238|C:T|D:N;N|248-249|C:T|D:N;N|247|T:T|N:N;N|261-262|C:T|D:N
												SNP	2.53	68|0.30;0-67,69-72|0.00	20565160	G|L	N|161|^:^|^:^;N|219|^:^|^:^;N|258-259|A:G|F:L
4	SMG1	Homo sapiens smg-1 homolog phosphatidylinositol 3-kinase-related kinase (C. elegans) (SMG1) mRNA.	Stress Response	NM_015092	chr16	61.59	1e-06	0.61	0.1	-	5	SNP	4.54	0-72|0.00	18828668	G|A	N|32|^:^|^:^;N|84|^:^|^:^;N|129|^:^|^:^;N|146,148|A:G|V:A
												SNP	9.12	0-72|0.00	18866208	C|R	N|120|C:G|R:T;N|129|C:G|R:T;N|138,141|C:G|R:T;N|174|C:G|R:T;N|261,263|C:G|R:T
												SNP	35.91	0-72|0.00	18875042	C|A	N|20|A:C|S:A;N|24|^:^|^:^;N|44|A:C|S:A;N|92,94|A:C|S:A;N|125|A:C|S:A;N|129|^:^|^:^;N|154|A:C|S:A;N|161|^:^|^:^;N|162,164|A:C|S:A;N|183-185,188-189|A:C|S:A;N|210,212|A:C|S:A;N|219|^:^|^:^;N|222-223,225-226|A:C|S:A;N|229-230|A:C|S:A;N|236-238|A:C|S:A;N|240-241,243|A:C|S:A;N|242|^:^|^:^;N|268,271|A:C|S:A;N|269|^:^|^:^
												SNP	6.97	24|0.31;0-23,25-72|0.00	18907410	G|R	N|88-89|A:G|C:R;N|161|^:^|^:^;N|219|^:^|^:^
												SNP	4.21	68|0.30;0-67,69-72|0.00	18908268	C|A	N|52|^:^|^:^;N|166|C:T|A:T;N|258-259|C:T|A:T
5	ACSM5	Homo sapiens acyl-CoA synthetase medium-chain family member 5 (ACSM5) mRNA.		NM_017888	chr16	51.18	1e-06	0.73	0.09	+	6	SNP	1.54	0-72|0.00	20422879	A|K	N|142|A:C|K:Q
												SNP	24.61	0-72|0.00	20423000	G|R	N|6,8-9|A:G|Q:R;N|46-47,49|A:G|Q:R;N|107|A:G|Q:R;N|115,117|A:G|Q:R;N|174|^:^|^:^;N|183-185,188-189|A:G|Q:R;N|214-215|A:G|Q:R
												SNP	2.97	31|0.72;0-30,32-72|0.00	20429507	G|G	N|111,114|A:G|S:G;N|123|^:^|^:^;N|174|^:^|^:^;N|203|^:^|^:^;N|209|^:^|^:^
												SNP	17.04	0-72|0.00	20429546	C|R	N|66-67|C:T|R:W;N|69-70,72|C:T|R:W;N|139|^:^|^:^;N|157,159-160|C:T|R:W;N|199|^:^|^:^;N|229-230|C:T|R:W;N|241|^:^|^:^
												SNP	0	31|0.72;0-30,32-72|0.00	20441083	C|T	N|111,114|C:G|T:S;N|175|^:^|^:^;N|194|^:^|^:^
												SNP	3.68	0-72|0.00	20442594	C|A	N|0-1|C:T|A:V;N|29|^:^|^:^;N|173|^:^|^:^;N|185|^:^|^:^;N|216|C:T|A:V;N|246|C:T|A:V;N|261|^:^|^:^
6	USP31	Homo sapiens ubiquitin specific peptidase 31 (USP31) mRNA.		NM_020718	chr16	50.97	1e-06	0.76	0.06	-	6	SNP	1.97	0-72|0.00	23079408	T|S	N|109|C:T|G:S;N|219-220|C:T|G:S
												SNP	24.96	0-72|0.00	23079621	C|D	N|14-15,18|C:T|D:N;N|56-57,59|C:T|D:N;N|107|C:T|D:N;N|126|C:T|D:N;N|132,134-135|C:T|D:N;N|142|C:T|D:N;N|209,211-212|C:T|D:N
												SNP	8.2	13|0.55;0-12,14-72|0.00	23080170	G|R	N|32|^:^|^:^;N|42-44|A:G|W:R
												SNP	4.22	0-72|0.00	23096952	C|A	N|191|C:T|A:T
												SNP	0	13|0.55;0-12,14-72|0.00	23099059	T|T	N|42-44|A:T|S:T;N|181|A:T|S:T
												SNP	10.12	23|0.29;0-22,24-28,30-72|0.00;29|-0.08	23160057	C|G	N|2|^:^|^:^;N|21|^:^|^:^;N|32|^:^|^:^;N|64|^:^|^:^;N|81|^:^|^:^;N|86-87|C:T|G:S;N|97|^:^|^:^;N|104,106|C:T|G:S;N|111|^:^|^:^;N|155|^:^|^:^;N|160-161|^:^|^:^;N|165|^:^|^:^;N|205|^:^|^:^;N|221|^:^|^:^;N|233|^:^|^:^;N|241|^:^|^:^;N|245|C:T|G:S;N|261|^:^|^:^
7	ITPRIPL2	Homo sapiens inositol 145-trisphosphate receptor interacting protein-like 2 (ITPRIPL2) transcript variant 1 mRNA.		NM_001034841	chr16	35.61	1e-06	0.3	0.1	+	3	SNP	5.92	68|0.30;0-67,69-72|0.00	19126331	C|P	N|2|^:^|^:^;N|54|^:^|^:^;N|56|^:^|^:^;N|153|^:^|^:^;N|223|^:^|^:^;N|258-259|C:T|P:L;N|261|^:^|^:^
												SNP	16.83	0-72|0.00	19127347	C|P	N|32|^:^|^:^;N|96|C:T|P:S;N|100|C:T|P:S;N|120|C:T|P:S;N|133-135|C:T|P:S;N|156|^:^|^:^;N|217-218|C:T|P:S;N|261-262|C:T|P:S
												del	13.43	0-72|0.00	19126044	CTC|FS	2|^:^|^:^;32|^:^|^:^;46,48,50|-:CTC|-:FS;80|^:^|^:^;108-109|-:CTC|-:FS;128,130|-:CTC|-:FS;160|^:^|^:^;186|^:^|^:^;204|^:^|^:^
8	ACSM2A	Homo sapiens acyl-CoA synthetase medium-chain family member 2A (ACSM2A) nuclear gene encoding mitochondrial protein mRNA.		NM_001010845	chr16	58.21	2e-06	0.06	0.3	+	5	SNP	5.77	5|0.06;0-4,6-72|0.00	20471506	T|Y	N|2|^:^|^:^;N|19,21|C:T|H:Y;N|116-117|C:T|H:Y;N|132|^:^|^:^;N|161|^:^|^:^;N|219|^:^|^:^
												SNP	19.86	0-72|0.00	20476893	G|E	N|22-24|A:G|K:E;N|36,38|A:G|K:E;N|113-114|A:G|K:E;N|118-119|A:G|K:E
												SNP	16.87	0-72|0.00	20477004	C|R	N|25|C:T|R:*;N|26|T:T|*:*;N|52,55|C:T|R:*;N|182|^:^|^:^
												SNP	12.63	0-72|0.00	20477021	G|W	N|163|^:^|^:^;N|165-166|A:G|*:W
												SNP	4.77	0-72|0.00	20491926	G|R	N|9|^:^|^:^;N|73|^:^|^:^;N|161|^:^|^:^;N|191|A:G|Q:R;N|219|^:^|^:^
9	XYLT1	Homo sapiens xylosyltransferase I (XYLT1) mRNA.		NM_022166	chr16	36.54	2e-05	1.59	0.009	-	5	SNP	5.04	71|0.64;0-50,52-70,72|0.00;51|-0.01	17211545	C|V	N|46|^:^|^:^;N|74|^:^|^:^;N|80|^:^|^:^;N|191|C:T|V:I;N|199|^:^|^:^;N|267|T:T|I:I
												SNP	10.18	31|0.72;67|0.12;0-30,32-66,68-72|0.00	17232234	G|P	N|111,114|A:G|L:P;N|165|^:^|^:^;N|231|^:^|^:^;N|254|A:G|L:P
												SNP	5.95	0-72|0.00	17292204	G|P	N|6,8-9|A:G|L:P;N|40|A:G|L:P
												SNP	4.76	30|0.12;0-29,31-72|0.00	17353170	C|K	N|75|^:^|^:^;N|107|C:G|K:N;N|153|^:^|^:^
												SNP	5.27	0-72|0.00	17353318	C|R	N|56,58|C:T|R:Q;N|98|^:^|^:^
10	SCNN1B	Homo sapiens sodium channel nonvoltage-gated 1 beta (SCNN1B) mRNA.	Ion channel activity;Neurological system process	NM_000336	chr16	33.56	3e-05	0.27	0.2	+	5	SNP	4.43	0-72|0.00	23360165	C|S	N|27|C:G|S:C;N|32|^:^|^:^;N|64|^:^|^:^;N|95-96|C:G|S:C
												SNP	11.47	0-72|0.00	23364276	C|R	N|29|^:^|^:^;N|83|^:^|^:^;N|112|^:^|^:^;N|153|^:^|^:^;N|181|C:T|R:W;N|236,238|C:T|R:W;N|242|^:^|^:^;N|250-252|C:T|R:W
												SNP	6.98	0-72|0.00	23387068	C|R	N|146,148|C:T|R:C;N|199|^:^|^:^
												SNP	8.45	17|0.28;0-16,18-50,52-72|0.00;51|-0.01	23388540	G|G	N|21|^:^|^:^;N|40|G:T|G:V;N|60-61|G:T|G:V;N|191|G:T|G:V;N|203|^:^|^:^
												SNP	2.97	0-72|0.00	23391980	C|T	N|32|^:^|^:^;N|64|^:^|^:^;N|75|^:^|^:^;N|183|^:^|^:^;N|209|^:^|^:^;N|267|C:T|T:M
11	ACSM3	Homo sapiens acyl-CoA synthetase medium-chain family member 3 (ACSM3) transcript variant 2 mRNA.		NM_005622	chr16	43.01	9e-05	0.12	0.2	+	6	SNP	3.87	0-72|0.00	20781486	G|E	N|78|^:^|^:^;N|244,246|C:G|Q:E
												SNP	5.22	0-72|0.00	20781558	T|W	N|128|^:^|^:^;N|163|^:^|^:^;N|200,203|C:T|R:W
												SNP	6.65	0-72|0.00	20787240	T|L	N|6|C:T|P:L;N|32|^:^|^:^;N|88,90|C:T|P:L;N|203|^:^|^:^
												SNP	12.64	0-72|0.00	20792388	G|W	N|82|^:^|^:^;N|139|^:^|^:^;N|191|A:G|*:W;N|203|^:^|^:^;N|231|^:^|^:^
												SNP	6.71	67|0.12;0-66,68-72|0.00	20801943	G|G	N|254|A:G|E:G
												SNP	9.36	0-72|0.00	20802007	C|Y	N|7-9|C:G|Y:*;N|120|C:G|Y:*;N|152|^:^|^:^;N|222|^:^|^:^
12	EARS2_DUP_01	Homo sapiens glutamyl-tRNA synthetase 2 mitochondrial (putative) (EARS2) nuclear gene encoding mitochondrial protein transcript variant 1 mRNA.		NM_001083614	chr16	27.18	0.0001	0.03	0.2	-	4	SNP	4.6	0-72|0.00	23536641	T|K	N|32|^:^|^:^;N|40|G:T|T:K;N|76|G:T|T:K
												SNP	7.24	40|0.03;0-39,41-72|0.00	23544000	C|E	N|32|^:^|^:^;N|143-144|C:T|E:K
												SNP	8.21	0-72|0.00	23555998	G|R	N|64|^:^|^:^;N|72|A:G|W:R;N|71|^:^|^:^;N|203|^:^|^:^
												SNP	9	0-72|0.00	23568649	T|R	N|13-14,16|C:T|G:R;N|54|^:^|^:^;N|111,114|C:T|G:R;N|173,176,178|C:T|G:R;N|184|^:^|^:^;N|223|^:^|^:^;N|234|^:^|^:^;N|262|^:^|^:^
13	ARHGAP17	Homo sapiens Rho GTPase activating protein 17 (ARHGAP17) transcript variant 2 mRNA.		NM_001006634	chr16	22.24	0.0002	1.38	0.002	-	2	SNP	4.08	69|0.91;0-68,70-72|0.00	24950845	C|A	N|161|^:^|^:^;N|223|^:^|^:^;N|260,262|C:T|A:T
												SNP	13.79	52|0.62;0-8,10-19,21-51,53-72|0.00;20|-0.01;9|-0.14	24950880	C|R	N|29-31|C:T|R:Q;N|69-70,72|C:T|R:Q;N|161|^:^|^:^;N|192,196-197|C:T|R:Q
14	EEF2K	Homo sapiens eukaryotic elongation factor-2 kinase (EEF2K) mRNA.	Oxidative stress response	NM_013302	chr16	26.72	0.0007	1.02	0.01	+	4	SNP	6.09	28|0.30;0-27,29-72|0.00	22278046	G|R	N|101-102|A:G|H:R
												SNP	7.1	0-72|0.00	22284975	T|F	N|116-117|G:T|C:F
												SNP	5.87	67|0.12;0-66,68-72|0.00	22285007	G|D	N|26|A:G|N:D;N|56|^:^|^:^;N|254|A:G|N:D
												del	4.96	47|0.60;0-46,48-72|0.00	22268982	TCT|LF	168-171|-:TCT|-:LF
15	TMC7	Homo sapiens transmembrane channel-like 7 (TMC7) transcript variant 2 mRNA.	Ion channel activity	NM_024847	chr16	23.7	0.003	0.08	0.3	+	6	SNP	4.6	18|0.07;0-17,19-72|0.00	19020725	A|K	N|63-64|A:C|K:T;N|265|A:C|K:T
												SNP	8.86	0-72|0.00	19020738	G	N|198|G:T
												SNP	1.61	0-72|0.00	19027834	G|S	N|74-75|A:G|N:S;N|199|^:^|^:^
												SNP	1.68	0-72|0.00	19049253	A|T	N|129|A:T|T:S;N|174|A:T|T:S;N|190|^:^|^:^;N|205|^:^|^:^
												SNP	7.47	0-72|0.00	19051741	G|G	N|29|^:^|^:^;N|223|^:^|^:^;N|267|A:G|D:G
												SNP	1.14	0-72|0.00	19067976	G|V	N|84|^:^|^:^;N|102|C:G|L:V;N|121|^:^|^:^
16	ERN2	Homo sapiens endoplasmic reticulum to nucleus signaling 2 (ERN2) mRNA.	Alzheimer Disease Presenilin Pathway	NM_033266	chr16	15.05	0.006	1.43	0.003	-	4	SNP	7.59	31|0.72;48|0.42;0-30,32-47,49-72|0.00	23702246	G|A	N|14|^:^|^:^;N|111,114|C:G|G:A;N|173,176,178|C:G|G:A;N|196|^:^|^:^
												SNP	0.85	0-72|0.00	23721844	C|V	N|41|C:T|V:I;N|102|C:T|V:I
												SNP	0.74	17|0.28;0-16,18-72|0.00	23721865	C|V	N|60-61|C:T|V:I;N|74|C:T|V:I;N|84|^:^|^:^
												SNP	1.3	0-72|0.00	23724556	G|L	N|2|^:^|^:^;N|163|^:^|^:^;N|173|^:^|^:^;N|217-218|A:G|F:L;N|223|^:^|^:^
17	GP2	Homo sapiens glycoprotein 2 (zymogen granule membrane) (GP2) transcript variant 2 mRNA.		NM_001007242	chr16	10.99	0.006	0.55	0.05	-	3	SNP	3.58	0-72|0.00	20327298	A|L	N|244,246|A:G|L:S;N|260|^:^|^:^
												SNP	3.26	12|0.24;0-11,13-72|0.00	20331705	C|G	N|39,41|C:T|G:E;N|209|^:^|^:^;N|261|^:^|^:^
												ins	3.62	24|0.31;0-23,25-72|0.00	20327328	-|-	88-89|-:GTA|-:Y
18	THUMPD1	Homo sapiens THUMP domain containing 1 (THUMPD1) mRNA.		NM_017736	chr16	6.79	0.01	0.3	0.03	-	2	SNP	4.88	3|0.30;0-2,4-72|0.00	20749242	A|M	N|10,12|A:G|M:T;N|32|^:^|^:^
												SNP	2.52	0-72|0.00	20750372	G|P	N|80|^:^|^:^;N|116-117|A:G|S:P;N|163|^:^|^:^
19	RBBP6	Homo sapiens retinoblastoma binding protein 6 (RBBP6) transcript variant 3 mRNA.		NM_006910	chr16	15.9	0.01	0.62	0.07	+	3	SNP	3.32	0-72|0.00	24573280	T|S	N|6|^:^|^:^;N|32|^:^|^:^;N|84|^:^|^:^;N|153|^:^|^:^;N|204-206,208|C:T|P:S;N|241|^:^|^:^
												SNP	4.53	0-72|0.00	24582580	G|S	N|32|^:^|^:^;N|75|^:^|^:^;N|186|^:^|^:^;N|199|^:^|^:^;N|267|G:T|S:I
												del	7.18	52|0.62;0-51,53-72|0.00	24583469	CAGCCCCAGCGT|SSPSV	192,196-197|-:CAGCCCCAGCGT|-:SSPSV
20	LOC81691	Homo sapiens exonuclease NEF-sp (LOC81691) transcript variant 1 mRNA.		NM_030941	chr16	6.2	0.02	0.27	0.06	+	2	SNP	4.96	50|0.27;0-49,51-72|0.00	20856030	G|G	N|183-184,186-188|G:T|G:V
												SNP	1.62	0-72|0.00	20856541	C|P	N|165-166|A:C|H:P
21	GDE1	Homo sapiens glycerophosphodiester phosphodiesterase 1 (GDE1) mRNA.		NM_016641	chr16	2.98	0.03	0.33	0.02	-	1	SNP	1.47	34|0.33;0-33,35-72|0.00	19519044	C|V	N|121,123|A:C|L:V
22	ERI2	Homo sapiens ERI1 exoribonuclease family member 2 (ERI2) transcript variant 1 mRNA.		NM_001142725	chr16	4.23	0.03	0.61	0.02	-	1	SNP	1.42	27|0.61;0-26,28-72|0.00	20809915	G|P	N|99-100|C:G|A:P
23	SLC5A11	Homo sapiens solute carrier family 5 (sodium/glucose cotransporter) member 11 (SLC5A11) mRNA.		NM_052944	chr16	10.45	0.03	0.12	0.1	+	2	SNP	6.93	67|0.12;0-66,68-72|0.00	24886978	C|R	N|152|^:^|^:^;N|196|^:^|^:^;N|254|C:T|R:C
												SNP	4.95	0-72|0.00	24902299	C|F	N|64|^:^|^:^;N|67|C:G|F:L;N|222,224-225|C:G|F:L
24	LYRM1	Homo sapiens LYR motif containing 1 (LYRM1) transcript variant 3 mRNA.		NM_020424	chr16	3.87	0.04	0.12	0.04	+	1	SNP	3.32	30|0.12;0-29,31-72|0.00	20935362	G|R	N|13|^:^|^:^;N|87|A:G|Q:R;N|107|A:G|Q:R;N|145|A:G|Q:R;N|175|^:^|^:^

## Sheet: TableS1d
Table S1d: Summary of Reading Impairment Recessive Candidate Variants
Rank	Gene	FullName	Found in Pathway	mRNA	Chr	Score	PValue	LOD_Score	LOD_PValue	Strand	#ofVar	VarType	VarScore	VarLODScore	VarPosition	Ref	GenoType
1	ACSM2B	Homo sapiens acyl-CoA synthetase medium-chain family member 2B (ACSM2B) nuclear gene encoding mitochondrial protein transcript variant 1 mRNA.		NM_182617	chr16	90.45	1e-06	1.16	0.003	-	7	SNP	10.87	27|0.602059999132221;31|0.602059988709154;0-26,28-30,32-72|0	20551987	A|Y	N|51|^:^|^:^;N|112|^:^|^:^;N|114-115|A:T|Y:N
												SNP	4.27	27|0.602059999132221;31|0.602059988709154;0-26,28-30,32-72|0	20554295	T|K	N|117-118,120|C:T|E:K;N|126|^:^|^:^;N|252|C:T|E:K;N|251|^:^|^:^
												SNP	12.77	27|0.602059999132221;31|0.602059988709154;0-26,28-30,32-72|0	20554524	C|G	N|77|^:^|^:^;N|114|A:C|*:G;N|201|^:^|^:^
												SNP	18.46	27|0.602059999132221;31|0.602059988709154;0-26,28-30,32-72|0	20554582	T|E	N|6|^:^|^:^;N|18|G:T|D:E;N|27|G:T|D:E;N|32|^:^|^:^;N|68|^:^|^:^;N|77|^:^|^:^;N|121,123|G:T|D:E;N|170|^:^|^:^;N|201|^:^|^:^;N|208-209,211|G:T|D:E;N|222|^:^|^:^;N|251-252|G:T|D:E
												SNP	34.74	27|0.602059999132221;31|0.602059988709154;0-26,28-30,32-72|0	20559726	C|D	N|0-4|C:T|D:N;N|44,46|C:T|D:N;N|65-66|C:T|D:N;N|77|^:^|^:^;N|103-104|C:T|D:N;N|102|T:T|N:N;N|134,137|C:T|D:N;N|161-162|C:T|D:N;N|186|^:^|^:^;N|201|^:^|^:^;N|224|^:^|^:^;N|231,234|C:T|D:N
												SNP	3.33	27|0.602059999132221;31|0.602059988709154;0-26,28-30,32-72|0	20559777	T|I	N|6|C:T|V:I;N|77|^:^|^:^;N|201|^:^|^:^;N|251-252|C:T|V:I
												SNP	2.66	27|0.602059999132221;31|0.602059988709154;0-26,28-30,32-72|0	20565160	G|L	N|77|^:^|^:^;N|194-195|A:G|F:L;N|201|^:^|^:^
2	XYLT1	Homo sapiens xylosyltransferase I (XYLT1) mRNA.		NM_022166	chr16	30.21	0.0001	0.04	0.05	-	5	SNP	9.65	8|0.602064337712235;0,2-7,9-72|0;1|-0.553655841577356	17211545	C|V	N|6|T:T|I:I;N|27|C:T|V:I;N|32|^:^|^:^;N|39|^:^|^:^;N|131|^:^|^:^;N|230|^:^|^:^
												SNP	6.08	8|0.602064337712235;0,2-7,9-72|0;1|-0.553655841577356	17232234	G|P	N|18|A:G|L:P;N|55|^:^|^:^;N|105|^:^|^:^;N|212,215|A:G|L:P
												SNP	6.08	8|0.602064337712235;0,2-7,9-72|0;1|-0.553655841577356	17292204	G|P	N|157,159-160|A:G|L:P;N|162|A:G|L:P
												SNP	1.29	8|0.602064337712235;0,2-7,9-72|0;1|-0.553655841577356	17353090	G|A	N|6|C:G|G:A;N|27|C:G|G:A;N|82|^:^|^:^;N|97|C:G|G:A;N|218|^:^|^:^
												SNP	5.4	8|0.602064337712235;0,2-7,9-72|0;1|-0.553655841577356	17353318	C|R	N|28,30|C:T|R:Q;N|78|^:^|^:^
3	UMOD	Homo sapiens uromodulin (UMOD) transcript variant 1 mRNA.		NM_001008389	chr16	49.6	0.02	0.59	0.02	-	6	SNP	4.56	23|0.602060009555289;0-22,24-72|0	20348036	G|T	N|208-209,211|A:G|I:T
												SNP	0	23|0.602060009555289;0-22,24-72|0	20348048	G|T	N|172|G:T|T:N
												SNP	8.28	23|0.602060009555289;0-22,24-72|0	20352615	G|R	N|1|^:^|^:^;N|32-34|A:G|W:R;N|55|^:^|^:^;N|109|^:^|^:^;N|252|^:^|^:^
												SNP	32.35	23|0.602060009555289;0-22,24-72|0	20352618	C|V	N|15-16|A:C|L:V;N|68-70,72|A:C|L:V;N|90-91|A:C|L:V;N|154,156|A:C|L:V;N|167-168|A:C|L:V;N|170|A:C|L:V;N|191-192|A:C|L:V;N|212,215|A:C|L:V
												SNP	4.65	23|0.602060009555289;0-22,24-72|0	20360277	C|G	N|90,92|C:G|G:R;N|181|^:^|^:^;N|206|^:^|^:^
												SNP	0	23|0.602060009555289;0-22,24-72|0	20360286	C|A	N|90,92|C:T|A:T;N|181|^:^|^:^;N|206|^:^|^:^
4	ACSM5	Homo sapiens acyl-CoA synthetase medium-chain family member 5 (ACSM5) mRNA.		NM_017888	chr16	64.04	0.05	0.58	0.07	+	8	SNP	0.15	4|0.616541426888;0-3,5-72|0	20422874	A|H	N|14|A:G|H:R
												SNP	1.66	4|0.616541426888;0-3,5-72|0	20422879	A|K	N|14|A:C|K:Q
												SNP	18.55	4|0.616541426888;0-3,5-72|0	20423000	G|R	N|32-34|A:G|Q:R;N|82-84,87-88|A:G|Q:R;N|142,144|A:G|Q:R;N|157,159-160|A:G|Q:R;N|259-260|A:G|Q:R
												SNP	3.1	4|0.616541426888;0-3,5-72|0	20429507	G|G	N|68|^:^|^:^;N|92|^:^|^:^;N|212,215|A:G|S:G;N|234|^:^|^:^
												SNP	17.57	4|0.616541426888;0-3,5-72|0	20429546	C|R	N|7-8,10|C:T|R:W;N|73,75-76|C:T|R:W;N|167-168|C:T|R:W;N|171|^:^|^:^;N|222-223|C:T|R:W;N|230|^:^|^:^
												SNP	17.24	4|0.615687654105364;0-3,5-72|0	20435314	C|L	N|1|^:^|^:^;N|32-34|C:T|L:F;N|82-84,87-88|C:T|L:F;N|142,144|C:T|L:F;N|157,159-160|C:T|L:F;N|168|C:G|L:V;N|259-260|C:T|L:F
												SNP	1.3	4|0.616541426888;0-3,5-72|0	20441083	C|T	N|2|^:^|^:^;N|212,215|C:G|T:S
												SNP	3.81	4|0.616541426888;0-3,5-72|0	20442594	C|A	N|65|^:^|^:^;N|84|^:^|^:^;N|124-125|C:T|A:V;N|166|C:T|A:V;N|217|^:^|^:^;N|235|^:^|^:^;N|261|C:T|A:V
5	ACSM3	Homo sapiens acyl-CoA synthetase medium-chain family member 3 (ACSM3) transcript variant 2 mRNA.		NM_005622	chr16	46.22	0.09	0.55	0.02	+	7	SNP	4	8|0.602064337712235;0-7,9-72|0	20781486	G|E	N|37|^:^|^:^;N|164,166|C:G|Q:E
												SNP	5.35	8|0.602064337712235;0-7,9-72|0	20781558	T|W	N|115|^:^|^:^;N|146|^:^|^:^;N|231,234|C:T|R:W
												SNP	6.78	8|0.602064337712235;0-7,9-72|0	20787240	T|L	N|157|C:T|P:L;N|227,229|C:T|P:L;N|234|^:^|^:^;N|238|^:^|^:^
												SNP	12.77	8|0.602064337712235;0-7,9-72|0	20792388	G|W	N|27|A:G|*:W;N|41|^:^|^:^;N|105|^:^|^:^;N|234|^:^|^:^
												SNP	4.81	8|0.602064337712235;0-7,9-72|0	20792435	C|P	N|17|^:^|^:^;N|27|A:C|T:P;N|171|^:^|^:^
												SNP	6.84	8|0.602064337712235;0-7,9-72|0	20801943	G|G	N|18|A:G|E:G
												SNP	9.49	8|0.602064337712235;0-7,9-72|0	20802007	C|Y	N|95|^:^|^:^;N|158-160|C:G|Y:*;N|207|^:^|^:^;N|246|C:G|Y:*

## Sheet: TableS1e
Table S1e: Table S1 Column Definitions
Columns are parsed results from the tool pVAAST’s “.vaast” output. For detailed explanation see: https://hufflab.org/software/pvaast/
Rank		The rank of the gene in their respect models
Gene		Gene ID
FullName		Full Name of the Gene
Found in Pathway		Pathway the variant affects
mRNA		Transcript ID
Chr		Chromosome
Score		VAAST score of the transcript
PValue		VAAST p-value of the transcript
LOD_Score		VAAST LOD score of the transcript
LOD_PValue		VAAST LOD p-value of the transcript
Strand		The strand of the gene
#ofVar		Total number of variants in the transcript
VarType		Type of the variant (SNP, ins, del, mnp)
VarScore		Score of each variant
VarLODScore		LOD Score of each variant
VarPosition		Position of variant
Ref		Reference allele at the variant position
Genotype		Genotypes of all samples with variant

## Sheet: TableS2
Table S2a: Summary of Language Impairment CNV Candidate Variants
chrom	start	stop	sv_type	overlap_CDS_percent	transcript_id	genes	patho_gain_list[phen|hpo|source|coord]	patho_loss_list[phen|hpo|source|coord]	StrVCTVRE	SvAnna	Sample_AF	Inheritance Patterns
15	90794757	90950358	<CN3>	0|0|3|100|0|100	NR_102428|NR_028287|NM_003870|NM_001033088|NR_104604|NM_001004309	CIB1|GABARAPL3|IQGAP1|NGRN|TTLL13P|ZNF774	.|.|.|.	.|.|.|.	0.561	1.2	1/524	ASD_LI_de_novo, ASD_RI_de_novo
Table S2b: Summary of Reading Impairment CNV Candidate Variants
chrom	start	stop	sv_type	overlap_CDS_percent	transcript_id	genes	patho_gain_list[phen|hpo|source|coord]	patho_loss_list[phen|hpo|source|coord]	StrVCTVRE	SvAnna	Sample_AF	Inheritance Patterns
16	21538186	21731120	<CN3>	100|0|100|52	NM_005849|NR_110930|NM_016025|NM_144672	IGSF6|LOC101927814|METTL9|OTOA	.|.|.|.	.|.|.|.	0.42	0.4	1/524	ASD_LI_de_novo, ASD_RI_de_novo
16	21608472	21747738	<CN3>	100|0|100|71	NM_005849|NR_110930|NM_016025|NM_144672	IGSF6|LOC101927814|METTL9|OTOA	.|.|.|.	.|.|dbVar:nssv15773659;dbVar:nssv8639828|16:21618158-21741439;16:21747582-21747711	0.417	0.4	1/524	ASD_LI_de_novo, ASD_RI_de_novo
Table S2 Column Definitions
Chrom	Chromosome
Start	Start position
Stop	Stop position
sv_type	Copy number of variant
overlap_CDS_percent	Percentage overlap with the coding region
transcript_id	Accession number of gene transcript
genes	HGNC IDs of genes encompassed by the variant
patho_gain_list[phen|hpo|source|coord]	OMIM pathogenicity annotation based on gain-of-function
patho_loss_list[phen|hpo|source|coord]	OMIM pathogenicity annotation based on loss-of-function
StrVCTVRE	Predicted pathogenicity score according to StrVCTVRE
SvAnna	Predicted pathogenicity score according to SvAnna (pSV)
Sample_AF	Allele frequency relative to the sample cohort (# of individuals with CNV / # of individuals in cohort)
Inheritance Patterns	Inheritance pattern according to GEMINI logic

## Sheet: TableS3
Table S3a: Summary of Language Impairment gSV/MEI Candidate Variants
AnnotSV_ID	SV_chrom	SV_start	SV_end	SV_length	SV_type	REF	ALT	Gene_name	Overlapped_tx_length	Overlapped_CDS_length	Overlapped_CDS_percent	Frameshift	Exon_count	Location	Location2	DDD_HI_percent	DDD_status	DDD_mode	DDD_consequence	DDD_disease	DDD_pmid	GnomAD_pLI	Inheritance_Patterns	Sample_AF	tissue_count_ME_isCausal	causal_tissues	popAF	psv
15_83275285_83275582_DEL_1	15	83275285	83275582	-299	DEL	A	<CN:0>	CPEB1	297	0	0.0	no	13	intron3-intron3	CDS	4.58						0.99899	ASD_LI_auto_rec;ASD_RI_auto_rec;	0.3113207547169811	0			0.0
15_71885481_71885814_DEL_1	15	71885481	71885814	-336	DEL	A	<CN:0>	THSD4	333	0	0.0	no	17	intron6-intron6	CDS	44.63						4.8082e-07	ASD_LI_auto_rec;ASD_RI_auto_rec;	0.9172794117647058	1	['Brain_Frontal_Cortex_BA9']		0.0
15_71991555_71991778_DEL_1	15	71991555	71991778	-226	DEL	T	<CN:0>	THSD4	223	0	0.0	no	17	intron7-intron7	CDS	44.63						4.8082e-07	ASD_LI_auto_dom;ASD_LI_auto_rec;ASD_RI_auto_dom;ASD_RI_auto_rec;	0.3327067669172932	0			0.0
15_75867326_75867614_DEL_1	15	75867326	75867614	-291	DEL	T	<CN:0>	PTPN9	288	0	0.0	no	13	intron1-intron1	CDS	48.39						0.10956	ASD_LI_auto_rec;ASD_LI_denovo;ASD_RI_auto_dom;ASD_RI_auto_rec;ASD_RI_denovo;	0.4342105263157895	2	['Brain_Nucleus_accumbens_basal_ganglia', 'Pituitary']		0.0
15_76522585_76522856_DEL_1	15	76522585	76522856	-271	DEL	T	<CN:0>	ETFA	271	0	0.0	no	12	intron10-intron10	CDS	10.27	confirmed	biallelic	loss of function	GLUTARIC ACIDURIA TYPE 2A	1430199;19249206;1882842;12815589;7912128;17412732	0.0029217	ASD_LI_denovo;ASD_RI_denovo;	0.0020408163265306	0			0.0
15_79220669_79233894_DEL_1	15	79220669	79233894	-13225	DEL	g	<DEL>	CTSH	13225	539	53.0	yes	12	intron1-intron8	CDS	62.67						1.2518e-08	ASD_LI_auto_dom;ASD_RI_auto_dom;	0.4857142857142857	0			1.0
15_83551631_83557676_DEL_1	15	83551631	83557676	-6049	DEL	T	<CN:0>	HOMER2	6045	0	0.0	no	9	intron2-intron2	CDS	32.29						0.0093921	ASD_LI_auto_rec;ASD_LI_denovo;ASD_RI_auto_dom;ASD_RI_denovo;	0.2675276752767527	0		0.65814696485623	0.0
15_84643753_84644082_DEL_1	15	84643753	84644082	-329	DEL	T	<CN:0>	ADAMTSL3	329	0	0.0	no	30	intron20-intron20	CDS	65.6						1.3662000000000002e-19	ASD_LI_denovo;ASD_RI_denovo;	0.0019305019305019	0			0.0
15_85462034_85462166_DEL_1	15	85462034	85462166	-132	DEL	G	<DEL>	SLC28A1	132	0	0.0	no	15	intron9-intron9	CDS	75.67						5.737e-20	ASD_LI_auto_dom;ASD_RI_auto_dom;	0.4959349593495935	0			0.0
15_91173985_91174308_DEL_1	15	91173985	91174308	-340	DEL	A	<CN:0>	CRTC3	323	0	0.0	no	15	intron11-intron11	CDS	50.06						0.86585	ASD_RI_auto_dom;	0.4797047970479705	0		0.3773961661341853	0.0
15_91173985_91174308_DEL_1	15	91173985	91174308	-340	DEL	A	<CN:0>	CRTC3-AS1	323	0	0.0	no	4	intron3-intron3	UTR								ASD_RI_auto_dom;	0.4797047970479705	0		0.3773961661341853	0.0
15_71143107_71143551_INS_1	15	71143107	71143551	444	INS	C	<INS:ME:SVA>	LARP6	444	0	0.0	no	3	intron1-intron1	5'UTR	78.33						0.66874	ASD_RI_auto_dom;	0.0038610038610038	0		0.0017971246006389	0.0
15_71677923_71678202_INS_1	15	71677923	71678202	279	INS	T	<INS:ME:ALU>	THSD4	279	0	0.0	no	17	intron5-intron5	CDS	44.63						4.8082e-07	ASD_LI_denovo;	0.0714285714285714	0			0.0
15_72639551_72639830_INS_1	15	72639551	72639830	279	INS	T	<INS:ME:ALU>	HEXA	279	0	0.0	no	14	intron10-intron10	CDS	39.76	confirmed	biallelic	loss of function	GM2-GANGLIOSIDOSIS TYPE 1	2522679;1384323;1837283;2848800;2954459;3754980;6959123;8490625;9603435;1833974;1322637;2934978;9272736;1532289;3362213;9401004;14648242;2140574;2961848;21937992;15108204;1483696;1301958;2976595;1301190;8757036;1302612;1827945;1825014	1.3405e-11	ASD_LI_denovo;ASD_RI_denovo;	0.9015444015444016	0		0.3835862619808307	0.0
15_73983319_73983599_INS_1	15	73983319	73983599	280	INS	T	<INS:ME:ALU>	CD276	280	0	0.0	no	8	intron1-intron1	5'UTR	70.53						2.4699e-09	ASD_LI_auto_rec;ASD_RI_auto_rec;	0.3532818532818533	0		0.2322284345047923	0.0
15_75867613_75867876_INS_1	15	75867613	75867876	263	INS	G	<INS:ME:ALU>	PTPN9	263	0	0.0	no	13	intron1-intron1	CDS	48.39						0.10956	ASD_LI_auto_dom;ASD_RI_auto_dom;	0.3301158301158301	0			0.0
15_77092501_77092758_INS_1	15	77092501	77092758	257	INS	T	<INS:ME:ALU>	SCAPER	257	117	2.0	no	33	intron7-intron8	CDS	23.01	possible	biallelic	loss of function	AUTOSOMAL RECESSIVE MENTAL RETARDATION	21937992	0.0087953	ASD_LI_auto_rec;ASD_RI_auto_dom;ASD_RI_auto_rec;	0.4285714285714285	4	['Brain_Cortex', 'Esophagus_Muscularis', 'Spleen', 'Testis']	0.2106629392971246	0.0
15_79167169_79167449_INS_1	15	79167169	79167449	280	INS	T	<INS:ME:ALU>	MORF4L1	280	0	0.0	no	10	intron1-intron1	5'UTR	2.12						0.99339	ASD_LI_auto_dom;ASD_RI_auto_dom;	0.1023166023166023	0		0.0908546325878594	0.0
15_85397472_85397753_INS_1	15	85397472	85397753	281	INS	T	<INS:ME:ALU>	ALPK3	281	0	0.0	no	14	intron5-intron5	CDS	81.06						8.415800000000001e-25	ASD_LI_denovo;ASD_RI_denovo;	0.1428571428571428	3	['Muscle_Skeletal', 'Brain_Putamen_basal_ganglia', 'Muscle_Skeletal']		0.0
15_86224963_86225242_INS_1	15	86224963	86225242	279	INS	T	<INS:ME:ALU>	AKAP13	279	0	0.0	no	37	intron14-intron14	CDS	65.04						0.92909	ASD_LI_auto_dom;ASD_LI_auto_rec;ASD_RI_auto_dom;ASD_RI_auto_rec;	0.1737451737451737	3	['Artery_Tibial', 'Brain_Cerebellar_Hemisphere', 'Brain_Cerebellum']	0.0595047923322683	0.0
15_92573054_92573334_INS_1	15	92573054	92573334	280	INS	T	<INS:ME:ALU>	SLCO3A1	280	0	0.0	no	10	intron2-intron2	CDS	28.13						0.38961	ASD_LI_auto_rec;ASD_RI_auto_dom;ASD_RI_auto_rec;	0.1795366795366795	0		0.1920926517571885	0.0
Table S3b: Summary of Reading Impairment gSV/MEI Candidate Variants
AnnotSV_ID	SV_chrom	SV_start	SV_end	SV_length	SV_type	REF	ALT	Gene_name	Overlapped_tx_length	Overlapped_CDS_length	Overlapped_CDS_percent	Frameshift	Exon_count	Location	Location2	DDD_HI_percent	DDD_status	DDD_mode	DDD_consequence	DDD_disease	DDD_pmid	GnomAD_pLI	Inheritance_Patterns	Sample_AF	tissue_count_ME_isCausal	causal_tissues	popAF	psv
16_18832544_18838377_DEL_1	16	18832544	18838377	-5841	DEL	T	<CN:0>	SMG1	5833	0	0.0	no	63	intron55-intron55	CDS	8.81						1.0	ASD_LI_auto_rec;ASD_RI_auto_dom;ASD_RI_auto_rec;	0.512962962962963	0			0.0
16_19230443_19230782_DEL_1	16	19230443	19230782	-345	DEL	G	<CN:0>	SYT17	339	0	0.0	no	8	intron5-intron5	CDS	37.25						1.0974e-05	ASD_LI_auto_rec;ASD_LI_denovo;ASD_RI_auto_dom;ASD_RI_auto_rec;ASD_RI_denovo;	0.7066420664206642	0		0.6940894568690096	0.0
16_19506335_19506636_DEL_1	16	19506335	19506636	-309	DEL	T	<CN:0>	TMC5	301	0	0.0	no	21	intron19-intron19	CDS	74.1						6.9877e-08	ASD_LI_auto_dom;ASD_LI_auto_rec;ASD_LI_denovo;ASD_RI_auto_dom;ASD_RI_auto_rec;ASD_RI_denovo;	0.7185185185185186	0			0.0
16_20778557_20778862_DEL_1	16	20778557	20778862	-312	DEL	G	<CN:0>	ACSM3	305	0	0.0	no	9	intron1-intron1	5'UTR	40.62						1.441e-14	ASD_LI_auto_rec;ASD_RI_auto_dom;ASD_RI_auto_rec;	0.7084870848708487	0			0.0
16_20923552_20923849_DEL_1	16	20923552	20923849	-297	DEL	C	<CN:0>	LYRM1	297	0	0.0	no	6	intron2-intron2	5'UTR	22.97						3.7249e-09	ASD_LI_denovo;	0.0057915057915057	0			0.0
16_22908966_22909243_DEL_1	16	22908966	22909243	-277	DEL	t	<DEL>	HS3ST2	277	0	0.0	no	2	intron1-intron1	CDS	34.14						0.10028	ASD_LI_auto_rec;ASD_RI_auto_rec;	0.7089552238805971	0			0.0
16_17414680_17414960_INS_1	16	17414680	17414960	280	INS	T	<INS:ME:ALU>	XYLT1	280	0	0.0	no	12	intron2-intron2	CDS	36.69	confirmed;probable	biallelic	cis-regulatory or promotor mutation;loss of function	Baratela Scott Syndrome;DESBUQUOIS DYSPLASIA 2	24581741;30554721	0.92418	ASD_LI_auto_dom;ASD_RI_auto_dom;	0.083011583011583	0		0.0115814696485623	0.0
16_20777644_20777924_INS_1	16	20777644	20777924	280	INS	G	<INS:ME:ALU>	ACSM3	280	0	0.0	no	9	intron1-intron1	5'UTR	40.62						1.441e-14	ASD_RI_auto_dom;	0.054054054054054	0		0.0804712460063897	0.0
16_20843131_20844439_INS_1	16	20843131	20844439	1308	INS	T	<INS:ME:SVA>	REXO5	1308	219	9.0	no	19	intron11-exon13	CDS								ASD_LI_auto_dom;ASD_RI_auto_dom;	0.0386100386100386	0			0.0
16_23865300_23865579_INS_1	16	23865300	23865579	279	INS	T	<INS:ME:ALU>	PRKCB	279	0	0.0	no	17	intron2-intron2	CDS	7.8						1.0	ASD_LI_auto_rec;ASD_RI_auto_dom;ASD_RI_auto_rec;	0.5366795366795367	0		0.358426517571885	0.0
16_24327581_24327860_INS_1	16	24327581	24327860	279	INS	T	<INS:ME:ALU>	CACNG3	279	0	0.0	no	4	intron1-intron1	CDS	23.44						0.99417	ASD_LI_auto_dom;ASD_RI_auto_dom;	0.3223938223938224	0		0.1805111821086262	0.0
16_26101608_26101889_INS_1	16	26101608	26101889	281	INS	C	<INS:ME:ALU>	HS3ST4	281	0	0.0	no	2	intron1-intron1	CDS	39.47						0.79575	ASD_RI_auto_dom;	0.0115830115830115	0		0.0621006389776357	0.0
Column Definitions
Columns are from the tool AnnotSV's output. For detailed explanation see https://lbgi.fr/AnnotSV/Documentation/README.AnnotSV_latest.pdf
DDD: Deciphering Developmental Disorders, contains phenotyping and genomic analysis data for children affected with severe undiagnosed developmental disorders (https://www.deciphergenomics.org/)
AnnotSV was used for the following columns: AnnotSV_ID, SV_chrom, SV_start, SV_end, SV_length, SV_type, REF, ALT, Gene_name, Overlapped_tx_length, Overlapped_CDS_length, Overlapped_CDS_percent, Frameshift, Exon_count, Location, Location2, DDD_HI_percent, DDD_status, DDD_mode, DDD_consequence, DDD_disease, DDD_pmid, GnomAD_pLI
AnnotSV_ID	ID of SV in AnnotSV
SV_chrom	Chromosome
SV_start	Start position
SV_end	Stop position
SV_length	Legth of the variant
SV_type	Type of the variant
REF	Reference allele
ALT	Alternative allele
Gene_name	Name of gene
Overlapped_tx_length	Length of overlapped transcript
Overlapped_CDS_length	Length of overlapped protein coding region
Overlapped_CDS_percent	Percentage of protein coding region that is overlapped
Frameshift	Variant causes frameshift
Exon_count	Number of exons
Location	Location of SV
Location2	Location of SV
DDD_HI_percent	Haploinsufficiency percent from DDD
DDD_status	Confirmation on functional impact of genes overlapping SV
DDD_mode	Allelic requirement
DDD_consequence	Mutation consequence on the gene product
DDD_disease	Diseases associated with genes overlapping SV
DDD_pmid	DDD Pubmed ID
GnomAD_pLI	gnomAD gene probability loss-of-function
Inheritance_Patterns	Inheritance pattern according to GEMINI
Sample_AF	Allele frequency relative to the sample cohort
tissue_count_Causal	The number of tissues where the gSV is the causal variant in GTEx
causal_tissues	The tissues where the gSV is the causal variant in GTEx
popAF	Allele frequency relative to the population samples (GTEx or gnomAD)
psv	Predicted pathogenicity score according to SvAnna (pSV)

## Sheet: TableS4a
Table S4a: Language Impairment Candidate Genes
Gene Name	Known_NDD	SNV	CNV	SV	GTEx	Brainspan	HDBR	pLI	oe_lof	LOEUF	mis_z_score	SNP_var_count	SNP_fam_count	CNV_var_count	CNV_fam_count	SV_var_count	SV_fam_count	Unique_fam_count	IMPC_Knockout
HEXA	0	0	0	1	1	1	1	1.3405e-11	6.8106e-01	9.7300e-01	-4.0903e-01	0	0	0	0	1	7	7	NA
TMED3	0	1	0	0	1	1	1	2.2622e-02	4.3068e-01	9.8500e-01	3.0307e-01	5	13	0	0	0	0	13	increased circulating iron level
KIAA1024	0	1	0	0	1	1	1	1.9551e-05	4.3501e-01	6.9200e-01	-4.3806e-01	10	22	0	0	0	0	22	NA
STRA6	0	1	0	0	0	1	1	1.5068e-10	5.7712e-01	8.2400e-01	5.9930e-01	4	7	0	0	0	0	7	NA
DNAJA4	0	1	0	0	1	1	1	2.0027e-03	3.9548e-01	7.1400e-01	9.3524e-01	4	14	0	0	0	0	14	increased mean corpuscular hemoglobin concentration::increased fasting circulating glucose level::decreased mean corpuscular volume::decreased circulating glucose level::abnormal sleep behavior
MYO9A	0	1	0	0	1	1	1	4.8923e-01	2.2436e-01	3.0400e-01	1.7401e+00	10	36	0	0	0	0	36	NA
ADAMTSL3	0	1	0	1	0	1	1	1.3662e-19	5.0730e-01	6.4700e-01	4.7550e-01	10	20	0	0	1	1	20	enlarged urinary bladder::abnormal ovary morphology::abnormal sternum morphology::enlarged heart::small spleen::small uterus::enlarged lymph nodes
ACSBG1	0	1	0	0	1	1	1	3.9590e-05	3.8698e-01	6.0500e-01	1.8305e+00	4	9	0	0	0	0	9	NA
CSPG4	0	1	0	0	1	1	1	2.6212e-05	3.1847e-01	4.5900e-01	1.4072e+00	11	31	0	0	0	0	31	NA
CYP1A1	0	1	0	0	0	0	1	1.0635e-17	1.2843e+00	1.7780e+00	-3.5740e-01	8	32	0	0	0	0	32	NA
FURIN	1	1	0	0	1	1	1	9.9994e-01	7.3795e-02	1.9100e-01	2.5033e+00	6	9	0	0	0	0	9	preweaning lethality, complete penetrance::embryonic lethality prior to tooth bud stage::brachydactyly::abnormal vibrissa morphology
CD276	1	0	0	1	1	1	1	2.4699e-09	7.5642e-01	1.1490e+00	4.8562e-02	0	0	0	0	1	4	4	hyperactivity::increased circulating total protein level::decreased mean corpuscular volume
ZNF774	1	1	1	0	1	0	1	2.2808e-15	1.0400e+00	1.4840e+00	1.6892e-01	4	7	1	1	0	0	8	NA
PTPN9	0	0	0	1	1	1	1	1.0956e-01	2.5622e-01	4.6200e-01	2.1018e+00	0	0	0	0	2	6	6	NA
ANPEP	0	1	0	0	0	0	1	3.7492e-09	4.5019e-01	6.3800e-01	1.4312e+00	7	13	0	0	0	0	13	abnormal cornea morphology::corneal deposits::increased cardiac muscle contractility
CTSH	0	0	0	1	1	1	1	1.2518e-08	6.6577e-01	1.0110e+00	5.3528e-01	0	0	0	0	1	2	2	abnormal retina outer nuclear layer morphology::increased bone mineral content::decreased total retina thickness::abnormal retina inner nuclear layer morphology::increased bone mineral density
UACA	0	1	0	0	1	1	1	3.2462e-29	7.7361e-01	9.7300e-01	4.7143e-01	5	8	0	0	0	0	8	NA
IL16	1	1	0	0	1	1	1	1.2449e-10	4.9209e-01	6.8700e-01	6.9994e-01	5	14	0	0	0	0	14	NA
ALPK3	0	1	0	1	0	0	1	8.4158e-25	7.1610e-01	9.1100e-01	1.3140e-01	10	27	0	0	1	1	28	increased heart weight::enlarged heart::dilated heart left ventricle::increased heart left ventricle size::preweaning lethality, incomplete penetrance::thick ventricular wall::decreased cardiac muscle contractility
AKAP13	0	1	0	1	0	1	1	9.2909e-01	2.1068e-01	2.9400e-01	-1.6419e+00	18	45	0	0	1	2	46	small liver::abnormal liver morphology::enlarged spleen::abnormal spleen morphology::microphthalmia::cataract::abnormal eye morphology::improved glucose tolerance::abnormal retina morphology::abnormal skin morphology::enlarged lymph nodes::abnormal lymph node morphology::abnormal vitreous body morphology::enlarged gallbladder::abnormal gallbladder morphology
GOLGA6A	0	1	0	0	0	0	1	1.6100e-05	8.4201e-01	1.5040e+00	-2.9409e-01	6	24	0	0	0	0	24	NA
C15orf39	0	1	0	0	0	NA	1	5.4058e-03	3.2977e-01	5.7500e-01	1.1195e+00	5	11	0	0	0	0	11	NA
HOMER2	0	0	0	1	1	1	1	9.3921e-03	3.5059e-01	6.5900e-01	3.1403e-01	0	0	0	0	1	4	4	increased prepulse inhibition::prolonged QRS complex duration::abnormal auditory brainstem response
POLG	0	1	0	0	1	1	1	2.0756e-09	4.0211e-01	5.5500e-01	-7.4177e-01	4	48	0	0	0	0	48	NA
SCAPER	0	1	0	1	1	1	1	8.7953e-03	2.5939e-01	3.7700e-01	2.7213e+00	6	9	0	0	1	2	10	decreased blood urea nitrogen level::decreased grip strength::preweaning lethality, incomplete penetrance::male infertility
ACAN	0	1	0	0	0	1	1	1.0000e+00	9.7582e-02	1.8300e-01	2.0716e-01	15	19	0	0	0	0	19	preweaning lethality, complete penetrance::increased circulating HDL cholesterol level
CPEB1	0	0	0	1	1	1	1	9.9899e-01	6.9400e-02	2.1800e-01	2.0987e+00	2	2	0	0	1	3	5	NA
MORF4L1	0	0	0	1	1	1	1	9.9339e-01	8.4133e-02	2.6500e-01	1.5856e+00	0	0	0	0	1	2	2	NA
KIAA1199	0	1	0	0	1	1	1	4.4023e-17	5.5551e-01	7.2800e-01	1.6603e+00	10	17	0	0	0	0	17	NA
SEMA4B	0	1	0	0	1	1	1	5.4103e-04	3.3539e-01	5.3300e-01	9.5608e-01	5	8	0	0	0	0	8	NA
THSD4	0	0	0	1	0	1	1	4.8082e-07	3.9339e-01	5.7200e-01	3.9929e-01	0	0	0	0	3	13	13	NA
FANCI	0	1	0	0	0	1	1	8.9116e-37	8.2993e-01	1.0240e+00	-1.3510e+00	7	8	0	0	0	0	8	preweaning lethality, incomplete penetrance
C15orf42	0	1	0	0	0	1	1	7.2142e-14	4.5353e-01	5.9900e-01	-1.4514e+00	10	15	0	0	0	0	15	NA
WHAMM	0	1	0	0	1	1	1	4.8122e-13	8.0755e-01	1.1530e+00	-1.8037e-01	6	9	0	0	0	0	9	NA

## Sheet: TableS4b
Table S4b: Reading Impairment Candidate Genes
Gene Name	Known_NDD	SNV	CNV	SV	GTEx	Brainspan	HDBR	pLI	oe_lof	LOEUF	mis_z_score	SNV_var_count	SNP_fam_count	CNV_var_count	CNV_fam_count	SV_var_count	SV_fam_count	Unique_fam_count	IMPC_Knockout
PRKCB	1	0	0	1	1	1	1	1.0000e+00	0.0000e+00	8.1000e-02	3.9870e+00	0	0	0	0	1	2	2	NA
ITPRIPL2	0	1	0	0	0	0	1	1.5396e-04	5.8445e-01	1.0540e+00	1.5879e+00	3	10	0	0	0	0	10	NA
SYT17	1	0	0	1	1	1	1	1.0974e-05	5.5950e-01	9.2600e-01	1.1778e+00	0	0	0	0	1	8	8	increased circulating serum albumin level::increased mean corpuscular volume::increased circulating alkaline phosphatase level::increased circulating total protein level::short tibia::decreased pulmonary ventilation::increased blood urea nitrogen level::increased circulating calcium level::increased pulmonary respiratory rate
ARHGAP17	0	1	0	0	1	1	1	1.9749e-02	2.7259e-01	4.4200e-01	1.5717e+00	2	4	0	0	0	0	4	increased transitional stage T1 B cell number::decreased mature B cell number::decreased bone mineral content::improved glucose tolerance::decreased circulating glucose level::decreased circulating fructosamine level::abnormal bone structure::decreased follicular B cell number::decreased B-1a cell number
HS3ST2	0	0	0	1	1	1	1	1.0028e-01	2.9982e-01	6.8600e-01	2.3046e+00	0	0	0	0	1	6	6	NA
LYRM1	0	0	0	1	1	1	1	3.7249e-09	1.4341e+00	1.9170e+00	-4.1564e-01	1	3	0	0	1	1	4	NA
TMC5	0	0	0	1	0	0	1	6.9877e-08	4.1923e-01	6.0400e-01	6.5340e-01	0	0	0	0	1	7	7	male infertility
USP31	0	1	0	0	1	1	1	6.2141e-02	2.5186e-01	4.0000e-01	1.4670e+00	6	14	0	0	0	0	14	increased circulating phosphate level::increased mean corpuscular hemoglobin concentration::abnormal gait::impaired pupillary reflex::decreased prepulse inhibition::increased eosinophil cell number::decreased exploration in new environment::increased lean body mass::decreased grip strength::increased prepulse inhibition::decreased hematocrit::increased circulating glucose level::increased circula…
XYLT1	0	1	0	1	1	1	1	9.2418e-01	1.7902e-01	3.3600e-01	5.8588e-01	6	9	0	0	1	1	10	preweaning lethality, complete penetrance::decreased thigmotaxis::abnormal facial morphology::abnormal limb morphology::abnormal behavior
DNAH3	1	1	0	0	0	0	1	1.5364e-64	6.9069e-01	7.9800e-01	2.9906e-02	16	43	0	0	0	0	43	NA
ACSM3	0	1	0	1	0	0	1	1.4410e-14	7.6059e-01	1.0550e+00	4.5569e-01	7	7	0	0	2	4	10	NA
TNRC6A	0	1	0	0	1	1	1	1.0000e+00	9.1024e-02	1.5900e-01	1.1316e+00	9	20	0	0	0	0	20	NA
SMG1	0	1	0	1	1	1	1	1.0000e+00	2.3202e-02	5.3000e-02	3.2976e+00	5	22	0	0	1	4	24	preweaning lethality, complete penetrance::increased circulating bilirubin level

[truncated: 1 more sheets: TableS4c]
